1 **A bacterial effector uncovers a metabolic pathway involved in resistance to**  
2 **bacterial wilt disease**

3

4 Yaru Wang<sup>1,2</sup>, Rafael J. L. Morcillo<sup>1</sup>, Gang Yu<sup>1</sup>, Achen Zhao<sup>1,2</sup>, Hao Xue<sup>1,2</sup>, Jose S.  
5 Rufian<sup>1</sup>, Yuying Sang<sup>1</sup>, and Alberto P. Macho<sup>1,\*</sup>.

6

7 <sup>1</sup>Shanghai Center for Plant Stress Biology, CAS Center for Excellence in Molecular  
8 Plant Sciences; Shanghai Institutes of Biological Sciences, Chinese Academy of  
9 Sciences, Shanghai 201602, China.

10 <sup>2</sup>University of Chinese Academy of Sciences, Beijing, China.

11

12 \* Corresponding author: Alberto P. Macho, [alberto.macho@sibs.ac.cn](mailto:alberto.macho@sibs.ac.cn)

13

14 Keywords: pyruvate decarboxylase; PDC; pyruvate; pyruvic acid; acetate; acetic acid;  
15 Arabidopsis; tomato; bacterial wilt; *Ralstonia*; virulence; type-III effector

16

17 **Abstract**

18 Bacterial wilt caused by the soil-borne pathogen *Ralstonia solanacearum* is a  
19 devastating disease worldwide. Upon plant colonization, *R. solanacearum* replicates  
20 massively, causing plant wilting and death; collapsed infected tissues then serve as a  
21 source of inoculum. In this work, we show that the metabolic pathway mediated by  
22 pyruvate decarboxylases (PDCs), activated in response to low oxygen and involved in  
23 drought stress tolerance, contributes to resistance against bacterial wilt disease.  
24 Arabidopsis and tomato plants with deficient PDC activity are more susceptible to  
25 bacterial wilt, and treatment with either pyruvic acid or acetic acid (substrate and  
26 product of the PDC pathway, respectively) enhances resistance. An effector protein  
27 secreted by *R. solanacearum*, RipAK, interacts with PDCs and inhibits their  
28 oligomerisation and enzymatic activity. This work reveals a metabolic pathway  
29 involved in resistance to biotic and abiotic stresses, and a bacterial virulence strategy  
30 to promote disease and the completion of the pathogenic life cycle.

## 31 Introduction

32

33 Environmental stresses have a strong impact on plant development and survival, and  
34 are therefore a serious threat to crop production. To cope with stress, plant cells are  
35 equipped with a sophisticated network of receptors, signalling pathways, and  
36 physiological responses that allow the integration of multiple and often simultaneous  
37 environmental signals to adapt to their changing environment. Although our  
38 understanding of the plant signalling pathways associated to stress (both biotic and  
39 abiotic) and metabolic adaptations has significantly expanded over the past few  
40 years, the association between these pathways is still poorly understood, and often  
41 limited by their man-made classification as responsive to one or another type of  
42 stress.

43

44 The bacterial plant pathogen *Ralstonia solanacearum* is the causal agent of the  
45 bacterial wilt disease in more than 250 plant species, including economically  
46 important crops, such as tomato, potato, pepper, eggplant, or banana (Elphinstone et  
47 al., 2005; Mansfield et al., 2012). As a soil-borne bacterium, *R. solanacearum* enters  
48 plants through the roots, invades the xylem vessels, and rapidly colonizes the whole  
49 plant (Xue et al, 2020). *R. solanacearum* shows a hemi-biotrophic behaviour,  
50 proliferating in live tissues in early stages of the infection; subsequently, massive  
51 bacterial replication and the production of large amounts of exopolysaccharide lead to  
52 clogging of the xylem vessels and vascular dysfunction, eventually causing plant  
53 wilting and death (Genin, 2010; Mansfield et al., 2012). Before its death, an infected  
54 plant can host a huge bacterial population, reaching up to  $10^{10}$  colony-forming units  
55 (cfu) per gram of tissue (Genin, 2010). Therefore, the wilting and collapse of plant  
56 tissues bring back to the soil an extremely concentrated bacterial inoculum for  
57 additional potential host plants, thus perpetuating the pathogenic cycle of *R.*  
58 *solanacearum*.

59

60 The best-studied plant defence mechanisms against invading pathogens rely on the  
61 perception of microbial molecules that are considered as invasion patterns (Cook et  
62 al., 2015). Highly conserved and abundant microbial molecules, often involved in  
63 housekeeping microbial functions, can be perceived by plants as  
64 pathogen-associated molecular patterns (PAMPs), and are notorious elicitors of plant  
65 immune responses (Boller and Felix, 2009). *R. solanacearum* PAMPs identified to  
66 date include the elongation factor *Tu* and cold-shock proteins (Lacombe et al., 2010;  
67 Wei et al., 2018). Most gram-negative bacterial pathogens use a type-III secretion  
68 system (T3SS) to inject effector proteins (type-III effectors; T3Es) inside plant cells.  
69 T3Es exert virulence activities aimed at promoting bacterial proliferation, such as the  
70 suppression of immunity or the manipulation of other plant functions (Macho, 2016;  
71 Macho and Zipfel, 2015; Toruño et al., 2016). However, resistant plants harbouring  
72 specific intracellular receptors can detect specific T3Es or their activities, activating  
73 immune responses (Chiang and Coaker, 2015). The T3E repertoire of *R.*  
74 *solanacearum* is particularly diverse: a single strain can inject more than 70 different  
75 T3Es inside plant cells (Sabbagh et al., 2019). Given that microbial effectors have  
76 evolved to target plant cellular functions that are important during plant-microbe  
77 interactions, they can be used as probes to identify and characterize plant cellular  
78 functions that contribute to disease resistance or susceptibility (Toruño et al., 2016).  
79 One of the T3Es in the *R. solanacearum* repertoire, RipAK (also known as Rip23  
80 (Mukaihara et al., 2010), is broadly conserved among strains from the phylotypes I  
81 and III (Sabbagh et al., 2019) (<https://iant.toulouse.inra.fr/T3E>), suggesting an  
82 important role in the pathogenicity of strains with the same phylogenetic origin. RipAK  
83 has been reported to localize at peroxisomes in protoplasts of *Arabidopsis thaliana*  
84 (hereafter, *Arabidopsis*), inhibiting host catalases to suppress plant immunity in  
85 tobacco (Sun et al., 2017). In this work, we found that RipAK localizes to the  
86 cytoplasm in *Nicotiana benthamiana* cells, in addition to forming speckles that partially  
87 overlap with peroxisomes. We show that, despite the redundancy expected among *R.*  
88 *solanacearum* T3Es, RipAK contributes significantly to the development of disease in  
89 *Arabidopsis* and tomato plants upon soil-drenching inoculation with *R. solanacearum*.

90 In plant cells, RipAK associates with plant pyruvate decarboxylases (PDCs), which  
91 are metabolic enzymes involved in fermentation under low oxygen conditions, and  
92 inhibits PDC enzymatic activity. Further genetic analysis showed that PDCs contribute  
93 to plant resistance against bacterial wilt, and chemical treatments showed that  
94 different organic acids in the PDC pathway, including pyruvate and acetate, enhance  
95 plant resistance against bacterial wilt. This work therefore reveals a novel pathway  
96 involved in disease resistance, which is inhibited by a *R. solanacearum* T3E, thus  
97 promoting the completion of the pathogenic life cycle.  
98

99 **Results and discussion**

100

101 **RipAK contributes to *R. solanacearum* infection in Arabidopsis and tomato**

102 RipAK is highly conserved in *R. solanacearum* strains from the phylotypes I and III  
103 (recently named *R. pseudosolanacearum*; Sabbagh et al., 2019), which include the  
104 reference GMI1000 strain. Such conservation suggests an important role of RipAK in  
105 the pathogenicity of *R. pseudosolanacearum* strains. To determine the contribution of  
106 RipAK to bacterial wilt caused by GMI1000, we generated a  $\Delta ripAK$  knockout mutant  
107 (Figures S1A and S1B). Upon soil-drenching inoculation, the  $\Delta ripAK$  mutation  
108 reduced significantly the ability of *R. solanacearum* to cause disease symptoms in  
109 Arabidopsis (Figures 1A, 1B, S1C, and S1D) and tomato (Figures 1C, 1D, S1E, and  
110 S1F), which is a natural and agronomically important host for *R. solanacearum*  
111 (Hayward, 1991). In both cases, such virulence attenuation was rescued by the  
112 complementation of *ripAK* in the mutant background (Figures 1A-D and S1A-F),  
113 indicating that, despite the large number of T3Es secreted by *R. solanacearum*,  
114 RipAK plays a significant role in bacterial virulence. Interestingly, we did not detect  
115 attenuation in the replication of the  $\Delta ripAK$  mutant upon bacterial injection in the stem  
116 of tomato plants (Figure S1G). Although stem injection is a more aggressive  
117 inoculation method that bypasses the root penetration and colonization process, the  
118 same experimental setup has allowed us to detect significant growth attenuation of  
119 T3E mutants impaired in the generation of bacterial nutrients or the suppression of  
120 plant immunity (Xian et al., 2019; Yu et al., 2019). Therefore, these results may  
121 suggest that, rather than being required for bacterial multiplication, the RipAK  
122 virulence activity contributes to the development of disease symptoms or the initial  
123 penetration through the root.

124

125 **RipAK subcellular localization in plant cells**

126 In order to understand the mode of action of RipAK in plant cells, we first studied the  
127 subcellular localization of a RipAK-GFP fusion protein expressed in *N. benthamiana*  
128 leaves using *Agrobacterium tumefaciens* (hereafter, *Agrobacterium*). RipAK-GFP

129 localized in speckles and in the cytoplasm of plant cells (Figure S2A). Western blot  
130 analysis did not show a detectable amount of cleaved GFP in the experimental  
131 conditions used in these assays (Figure S2B), suggesting that the observed  
132 fluorescence corresponds to the RipAK-GFP fusion. The observed cytoplasmic  
133 localization is in contrast with the previous observation that RipAK-GFP localizes in  
134 peroxisomes when transiently expressed in Arabidopsis protoplasts (Sun et al., 2017),  
135 although such study employed a shorter RipAK version with an N-terminal truncation  
136 of 70 amino acids in comparison with the conserved RipAK reference sequence used  
137 in this work (Sun et al., 2017; Figures S2C and S2D). We used GFP  
138 immunoprecipitation (IP) followed by mass spectrometry (MS) analysis to verify that  
139 the full RipAK-GFP (including the aforementioned 70 amino acids at the N-terminal)  
140 indeed accumulated in plant cells in our assays (Figure S2E). RipAK-GFP  
141 co-expression with the peroxisome marker PTS1 (Goedhart et al., 2012) fused to an  
142 mTurquoise2 fluorescent tag (mT-PTS1) showed that only a subgroup of the  
143 RipAK-GFP speckles co-localized with the peroxisome marker, while others did not  
144 (Figure S2A). Then, in order to compare both RipAK versions, we generated a  
145 RipAK<sup>Δ1-70</sup>-GFP truncated version (RipAK<sup>71-809</sup>), equivalent to that used by Sun *et al*  
146 (2017), with a predicted molecular weight approximately 7 kDa smaller than the full  
147 RipAK (Figures S2B and S2C). Both wild-type (WT) and truncated versions showed  
148 similar localization in the cytoplasm and fluorescent speckles (Figures S2A and S2B),  
149 suggesting that the different results in our work and that by Sun *et al* are due to the  
150 different experimental systems used.

151

### 152 **RipAK interacts with pyruvate decarboxylases (PDCs)**

153 To identify protein targets of RipAK in plant cells, we performed a yeast two-hybrid  
154 (Y2H) screen using RipAK as a bait against a library of cDNA from tomato roots  
155 inoculated with *R. solanacearum*, obtaining numerous colonies containing different  
156 fragments of a tomato gene encoding a homolog of Arabidopsis *PYRUVATE*  
157 *DECARBOXYLASE (PDC)* genes (Table S1, Figure S3A). Arabidopsis has three  
158 genes annotated as *PDCs*, which encode predicted cytoplasmic proteins, and

159 AtPDC1-GFP was shown to localize in the cytoplasm in Arabidopsis (Rasheed et al.,  
160 2018); accordingly, RipAK-GFP co-localized with different RFP-tagged AtPDCs in the  
161 cytoplasm upon transient expression in *N. benthamiana* (Figure S3B). The interaction  
162 between RipAK and SIPDC2 (identified in the Y2H screen; Figure S3A) was  
163 confirmed *in planta* by coIP of RipAK tagged with hemagglutinin (HA) and  
164 SIPDC2-GFP transiently expressed in *N. benthamiana* (Figure 2A). The association  
165 between RipAK-HA and AtPDCs-GFP (AtPDC1, AtPDC2, and AtPDC3) was also  
166 detected by coIP (Figure 2B), and direct interaction between these proteins was  
167 confirmed by Split-Luciferase (Split-LUC) assays (Figures 2C and S3C). Intriguingly,  
168 upon IP of either SIPDC2-GFP or AtPDCs-GFP, we found an additional  
169 immunoprecipitated band of RipAK-HA, which was approximately 20-25 kDa smaller  
170 than the original RipAK-HA (Figures 2A and 2B). Since that smaller band was not  
171 present in crude extracts, it is possible that RipAK undergoes N-terminal cleavage  
172 upon interaction with PDCs in plant cells.

173

#### 174 ***R. solanacearum* infection enhances PDC activity**

175 In conditions of anoxia, plants use PDCs to convert pyruvate into acetaldehyde to  
176 contribute to the fermentation process; acetaldehyde can be detoxified into acetate by  
177 aldehyde dehydrogenases (Kürsteiner et al., 2003) (Figure S3D). The expression of  
178 *PDC* genes is low in basal conditions, but is up-regulated in conditions of anoxia,  
179 drought, and other stresses (Kim et al., 2017; Kürsteiner et al., 2003; Mithran et al.,  
180 2014). Interestingly, the expression of several *PDC* orthologs in different plant species  
181 is up-regulated upon *R. solanacearum* inoculation (Table S2). This prompted us to  
182 measure PDC activity in Arabidopsis and tomato during *R. solanacearum* infection.  
183 As shown in Figure 3A, Arabidopsis Col-0 WT seedlings showed an increase in PDC  
184 activity as early as 2 days after inoculation with *R. solanacearum* GMI1000. A similar  
185 pattern was observed in tomato stems starting one day after injection of *R.*  
186 *solanacearum* GMI1000 (Figure 3B). PDC activity did not increase significantly upon  
187 inoculation with a non-pathogenic  $\Delta hrpG$  mutant strain (Figure 3A), which cannot  
188 express the T3SS and other virulence factors (Valls et al., 2006), is impaired in



189 vascular colonization (Vasse et al., 2000), and does not cause disease symptoms  
190 (Brito et al., 1999). It is noteworthy that, during an active infection by a pathogenic  
191 strain, *R. solanacearum* rapidly consumes the available oxygen present in the xylem,  
192 generating a hypoxic environment (Dalsing et al., 2015). Therefore, our data could  
193 suggest that the fast replication of *R. solanacearum* GMI1000 (but not the  
194 non-pathogenic mutant) and the subsequent depletion of available oxygen triggers a  
195 response to hypoxia in infected tissues, including a rapid increase of PDC activity.  
196 However, given the complexity of the *R. solanacearum* infection process, other  
197 explanations for this response cannot be ruled out.

198

### 199 **PDCs contribute to plant resistance against *R. solanacearum***

200 PDCs contribute to plant resistance against abiotic stress, including anoxia and  
201 drought (Kim et al., 2017; Kürsteiner et al., 2003). In order to determine if PDCs  
202 contribute to resistance against *R. solanacearum*, we first ordered mutant lines with  
203 T-DNA insertions in *AtPDC1*, *AtPDC2*, and *AtPDC3* (Figure S4A), and determined the  
204 expression of these genes in seedlings of each mutant line. Although the expression  
205 of each gene was virtually abolished in its respective mutant line, we noticed that the  
206 *pdc1* mutant line showed constitutive up-regulation of the expression of the *PDC3*  
207 gene, and the *pdc3* mutant line showed constitutive up-regulation of the expression of  
208 the *PDC2* gene (Figures S4B-D), which may reflect compensatory effects among  
209 functionally redundant genes. On the contrary, the *pdc2* mutant line showed slightly  
210 reduced expression of *PDC1* gene. We then analysed PDC activity in each mutant  
211 line; although all three mutants showed lower PDC activity compared to WT plants in  
212 specific biological replicates, only the *pdc2* mutant displayed a reproducible reduction  
213 in all replicates (Figure S4E). Accordingly, the enhancement of PDC activity observed  
214 during *R. solanacearum* infection was significantly compromised in *pdc2* mutant  
215 plants (Figure 3A). For these reasons, we decided to use the *pdc2* mutant for further  
216 experiments. Compared to WT plants, *pdc2* mutants showed enhanced susceptibility  
217 to bacterial wilt upon inoculation with *R. solanacearum* GMI1000 (Figures 3C, 3D,  
218 S5A, and S5B). Interestingly, the *pdc2* mutation was able to rescue the virulence

219 attenuation caused by the *ΔripAK* mutation (Figures 3C, 3D, S5A, and S5B). These  
220 results indicate that PDC2 contributes to resistance against bacterial wilt in  
221 Arabidopsis, and point at PDC2 as a relevant target of RipAK virulence activity.

222

223 To determine the contribution of PDCs to bacterial wilt resistance in tomato, we used  
224 tomato plants with transgenic roots expressing an RNAi construct that silenced the  
225 expression of *SIPDC2* (Figure S5C). These plants showed significantly enhanced  
226 susceptibility upon inoculation with *R. solanacearum* GMI1000 (Figures 3E, 3F, S5D,  
227 and S5E), indicating that PDCs also contribute to resistance against bacterial wilt in  
228 tomato. We were unable to generate Arabidopsis plants overexpressing *AtPDC*  
229 genes, and tomato plants with roots overexpressing *SIPDC2* showed very strong  
230 pleiotropic effects, suggesting that, in our experimental conditions, plants may not be  
231 able to tolerate sustained overexpression of *PDC* genes.

232

233 We have observed that *R. solanacearum* infection causes a prompt activation of PDC  
234 activity, probably as a result of the active bacterial replication and the subsequent  
235 oxygen depletion (Figures 3A and 3B). The activation of PDC activity leads to a  
236 dynamic metabolic flux conversion from glycolysis into acetate synthesis, conferring  
237 tolerance to conditions of low water availability (Kim et al., 2017). The enhanced  
238 susceptibility to bacterial wilt symptoms observed in plants with mutated or silenced  
239 *PDCs* could suggest that the activation of the PDC-mediated acetate pathway may  
240 trigger a response that prepares the plant to face better the water deficiency caused  
241 by the vascular clogging associated to *R. solanacearum* infection, which eventually  
242 causes disease symptoms. In such scenario, plants with deficient PDC activity may  
243 develop faster and stronger symptoms, which is in agreement with our observations in  
244 Arabidopsis and tomato (Figures 3 and S5).

245

246 **The PDC-mediated pathway contributes to resistance against *R. solanacearum***  
247 **in tomato**

248 To determine whether the PDC-mediated acetate pathway enhances resistance to *R.*  
249 *solanacearum*, we pre-treated tomato plants with exogenous pyruvic acid and acetic  
250 acid, as substrate and product of the pathway, respectively. Treatments were  
251 performed by placing the pots on a layer of wet towel paper containing the organic  
252 acids for 9 days, as previously described (Kim et al., 2017). The pots were then  
253 washed to remove the remaining acids and watered normally without treatment for 3  
254 days before bacterial inoculation. Pre-treatment with both pyruvic and acetic acid  
255 strongly enhanced resistance against *R. solanacearum* infection, shown as a drastic  
256 reduction and delay of wilting symptoms (Figures 3G-I, S5F and S5G). Pre-treatment  
257 with other organic acids caused different outcomes: citric acid significantly reduced  
258 disease symptoms (Figures 3G-I), although its impact across multiple independent  
259 experiments was not as strong as those of pyruvic or acetic acid (Figures S5F and  
260 S5G), and formic acid did not have a significant impact on disease symptoms (Figures  
261 3G-I, S5F and S5G). Interestingly, pre-treatment with pyruvic and acetic acid did not  
262 affect *R. solanacearum* replication upon injection in tomato stems (Figure S5H).  
263 Considering that a deficiency in the PDC pathway enhances the severity of bacterial  
264 wilt (Figure 3A-F), and that pyruvic and acetic acid treatments enhance disease  
265 resistance (Figure 3G-I), the activation of the PDC-mediated acetate pathway may  
266 indeed contribute to a reduction of disease symptoms by a similar mechanism  
267 involved in resistance against drought, although we should not discard the possibility  
268 that this pathway actively contributes to resistance against bacterial proliferation, for  
269 example, by modulating hormone signalling (Kim et al., 2017).

270

### 271 **RipAK inhibits PDC oligomerisation and activity *in vivo***

272 Given that the PDC pathway contributes to disease resistance against bacterial wilt  
273 and that mutation of *pdc2* (which reduces PDC activity) rescues the virulence  
274 attenuation of a *R. solanacearum*  $\Delta$ *ripAK* mutant (Figure 3), we sought to determine  
275 whether RipAK inhibits the enzymatic activity of PDC2. Overexpression of *AtPDC2* in  
276 *N. benthamiana* enhanced PDC activity in comparison to control conditions (Figures  
277 4A and 4B). The simultaneous expression of RipAK did not affect the accumulation of

278 AtPDC2 (Figure 4B), but significantly reduced PDC activity (Figures 4A and 4B). PDC  
279 enzymes are known to form oligomers, and molecular studies in yeast PDCs have  
280 shown that oligomerisation is required for enzymatic activity (Killenberg-Jabs et al.,  
281 2001). Upon transient expression in *N. benthamiana*, we also detected direct  
282 interaction between different AtPDC2 versions tagged with different halves of  
283 luciferase (Figure 4C-E). Interestingly, AtPDC2 oligomerisation *in planta* was inhibited  
284 by RipAK (Figure 4C-E), suggesting that this could be the molecular mechanism  
285 behind the RipAK-mediated inhibition of PDC activity. It is generally accepted that  
286 effector proteins often display multiple targets in plant cells (Macho and Zipfel, 2015),  
287 and RipAK has also been shown to target and suppress the activity of catalases in  
288 tobacco cells (Sun et al., 2017). Interestingly, like PDCs, catalases are active as  
289 oligomers (Nicholls et al., 2000). Although the mechanism of the targeting of  
290 catalases is unclear, it is possible that RipAK inhibits the activity of specific host target  
291 enzymes during the infection by inhibiting their oligomerisation or their association  
292 with interacting partners required for their enzymatic activity.

293

## 294 **Conclusions**

295 Bacterial pathogens employ T3Es to suppress immunity and manipulate other cellular  
296 functions, including the subversion of plant metabolism by different means (Macho,  
297 2016). Recent studies have revealed that *R. solanacearum* T3Es seems to be  
298 particularly prolific at altering plant metabolism upon delivery inside plant cells:  
299 RipTPS catalyzes the production of trehalose (Poueymiro et al., 2014), Brg11 induces  
300 an increase in polyamine levels, triggering a defence reaction that likely inhibits other  
301 microbial competitors (Wu et al., 2019), and RipI induces the production of GABA to  
302 support bacterial nutrition (Xian et al., 2019).

303

304 Upon invasion of plant tissues, *R. solanacearum* colonizes xylem vessels and  
305 replicates rapidly, which depletes the available oxygen (Dalsing et al., 2015). The  
306 rapid increase of PDC activity in plant tissues undergoing *R. solanacearum* infection  
307 (Figure 3) suggests that plants may respond to pathogen-induced hypoxia by

308 up-regulating *PDC* genes. Subsequently, the activation of the PDC-acetate pathway  
309 contributes to alleviating disease-associated wilting symptoms (Figure 3). Given that  
310 disease-associated wilting symptoms are likely produced by the restriction in water  
311 conductivity derived from vascular clogging, the contribution of the PDC-acetate  
312 pathway to disease resistance likely resembles its contribution to drought resistance  
313 (Kim et al., 2017), constituting a physiological form of disease resistance. Similarly,  
314 ABA, which also acts as a drought stress signal in plants, has been shown to  
315 contribute to plant resistance against bacterial wilt (Feng et al., 2012). In addition to  
316 this, PDCs may participate in metabolic functions that contribute to the activation of  
317 other immune responses. This response, leading to a delay or abolishment of disease  
318 symptoms, would also interfere with the bacterial life cycle by impeding bacteria to  
319 return to the soil and invade additional plants. *R. solanacearum* may have evolved to  
320 counteract such plant response by secreting RipAK, which associates with PDCs and  
321 inhibits PDC activity. In agreement with this hypothesis, bacteria lacking RipAK  
322 induce slower disease symptoms, while plants with deficient PDC activity develop  
323 stronger disease symptoms, partially rescuing the virulence attenuation of a *R.*  
324 *solanacearum*  $\Delta$ *ripAK* mutant. The virulence activity of RipAK would therefore enable  
325 bacteria to complete its life cycle and infect new host plants. Thus, the study of RipAK  
326 virulence activity has allowed us to uncover the function of the PDC pathway in  
327 disease tolerance, shedding light on the integration between plant responses to biotic  
328 and abiotic stresses.  
329

330 **Acknowledgements**

331 We thank Nemo Peeters and Anne-Claire Cazale for sharing unpublished biological  
332 materials, Motoaki Seki and Jian-Min Zhou for sharing biological materials, Rosa  
333 Lozano-Duran for critical reading of this manuscript, Xinyu Jian for technical and  
334 administrative assistance during this work, and all the members of the Macho and  
335 Lozano-Duran laboratories for helpful discussions. We thank the PSC Cell Biology,  
336 Proteomics, and Metabolomics core facilities for assistance with enzymatic activity  
337 assays, confocal microscopy, and mass spectrometry. This work was supported by  
338 the Strategic Priority Research Program of the Chinese Academy of Sciences  
339 (grant XDB27040204), the National Natural Science Foundation of China (NSFC;  
340 grant 31571973), the Chinese 1000 Talents Program, and the Shanghai Center for  
341 Plant Stress Biology (Chinese Academy of Sciences). The authors have no conflict of  
342 interest to declare.

343

344

345 **Author contributions**

346 Y.W. and A.P.M. designed the work, supervised experiments, and analysed data.  
347 Y.W. performed most of the experimental work. R.J.L.M, G.Y., A.Z., H.X., J.S.R., and  
348 Y.S. performed additional experiments. Y.W. and A.P.M. wrote the manuscript with  
349 inputs from all the authors.

350

351 **Figure legends**

352

353 **Figure 1. RipAK contributes to *R. solanacearum* infection.**

354 *R. solanacearum* soil-drenching inoculation assays in Arabidopsis (A, B) and tomato  
355 (C, D) performed with GM11000 WT,  $\Delta ripAK$  mutant, and RipAK complementation  
356 ( $\Delta ripAK/RipAK$ ) strains.  $n \geq 15$  plants per genotype (for Arabidopsis) or  $n \geq 12$  plants per  
357 genotype (for tomato). In A and C, the results are represented as disease  
358 progression, showing the average wilting symptoms in a scale from 0 to 4 (mean  $\pm$   
359 SEM). B and D show the survival analysis of the data in A and C, respectively; the  
360 disease scoring was transformed into binary data with the following criteria: a disease  
361 index lower than 2 was defined as '0', while a disease index equal or higher than 2  
362 was defined as '1' for each specific time point. Statistical analysis was performed  
363 using a Log-rank (Mantel-Cox) test, and the corresponding p value is shown in the  
364 graph with the same colour as each curve. Nine and five independent biological  
365 replicates were performed for inoculations in Arabidopsis and tomato, respectively,  
366 and composite data representations are shown in Figure S1C-F.

367

368 **Figure 2. RipAK interacts with pyruvate decarboxylases.**

369 (A and B) Co-immunoprecipitation assays to determine interactions between RipAK  
370 and PDCs from tomato (A) and Arabidopsis (B). *A. tumefaciens* containing the  
371 indicated constructs were inoculated in *N. benthamiana* leaves and samples were  
372 taken 44 hours post-inoculation (hpi). Immunoblots were analysed with anti-GFP and  
373 anti-HA antibodies, and protein marker sizes are provided for reference. These  
374 experiments were performed 3 times with similar results. (C) RipAK interacts directly  
375 with Arabidopsis PDCs as determined by Split-LUC assays. RipAK-nLUC and  
376 cLUC-AtPDCs were co-expressed in *N. benthamiana* leaves, and luciferase  
377 complementation was observed 44 hpi. A colour code representing the relative  
378 luminescence is shown for reference. cLUC-AtSgt1a was used as negative interaction  
379 control. The accumulation of all the proteins was verified and is shown in Figure S3C.

380

381 **Figure 3. The PDC-mediated pathway contributes to resistance against *R.***  
382 ***solanacearum*.**

383 (A and B) *R. solanacearum* inoculation in Arabidopsis seedlings (A) or tomato stems  
384 (B) stimulates PDC enzymatic activity. (A) Roots of 8 day-old Arabidopsis seedlings  
385 were inoculated with 10  $\mu$ l of a  $10^5$  cfu ml<sup>-1</sup> *R. solanacearum* suspension. GMI1000  
386 WT or a  $\Delta$ *hrpG* mutant were used, as indicated, and water was used as mock  
387 treatment. (B) Stems of 3.5 week-old tomato plants were injected with 5  $\mu$ l of a  $10^5$  cfu  
388 ml<sup>-1</sup> *R. solanacearum* suspension. PDC activity was determined in whole seedlings  
389 (A) or stem tissue (B) 1, 2, and 3 dpi, and is represented as percentage PDC activity  
390 relative to the wild-type mock control for each day. In A, different letters indicate  
391 significantly different values within each time point, as determined using a one-way  
392 ANOVA statistical test ( $p < 0.05$ ). In B, asterisks indicate values significantly different to  
393 the mock control for each day, as determined using a Student's t test ( $p < 0.001$ ).  
394 Values represent mean  $\pm$  SEM ( $n=8$ ). Small error bars may not be visible in some  
395 columns. These experiments were performed 3 times with similar results.

396 (C and D) Soil-drenching inoculation assays in Arabidopsis Col-0 WT or *pdcc2*  
397 mutants, performed with GMI1000 WT or the  $\Delta$ *ripAK* mutant.  $n \geq 15$  plants per  
398 genotype. (E and F) Soil-drenching inoculation assays in tomato plants with  
399 transgenic roots expressing an empty vector (EV) or an RNAi construct to silence  
400 *SIPDC2*, performed with GMI1000 WT. Transgenic roots were generated using  
401 *Agrobacterium rhizogenes* (see methods).  $n \geq 8$  plants per genotype. (G and H)  
402 Soil-drenching inoculation assays in tomato plants upon pre-treatment with a 30 mM  
403 solution of the indicated organic acids or water (as mock control). Treatments were  
404 performed by placing the pots on a layer of wet towel paper containing the organic  
405 acids for 9 days, and then washed and watered normally without treatment for 3 days  
406 before inoculation with *R. solanacearum* GMI1000 WT.  $n \geq 12$  plants per treatment.  
407 In C, E, and G the results are represented as disease progression, showing the  
408 average wilting symptoms in a scale from 0 to 4 (mean  $\pm$  SEM). D, F, and H show  
409 the survival analysis of the data in C, E, and G, respectively; the disease scoring was  
410 transformed into binary data with the following criteria: a disease index lower than 2



411 was defined as '0', while a disease index equal or higher than 2 was defined as '1' for  
412 each specific time point. Statistical analysis was performed using a Log-rank  
413 (Mantel-Cox) test, and the corresponding p value is shown in the graph with the same  
414 colour as each curve. Four, three, and seven independent biological replicates were  
415 performed for inoculations in C, E, and G, respectively, and composite data  
416 representations are shown in Figure S5. (I) Representative images of the inoculated  
417 plants in G-H 17 dpi.

418

419 **Figure 4. RipAK inhibits PDC oligomerisation and activity *in vivo*.**

420 (A) RipAK inhibits AtPDC2 activity in *N. benthamiana*. AtPDC2-FLAG was expressed  
421 in *N. benthamiana* leaves using *Agrobacterium*, and GUS-FLAG was used as control.  
422 RipAK-GFP (or GFP, as control) was co-expressed with the FLAG-tagged proteins.  
423 PDC activity was determined 36 hpi (mean  $\pm$  SEM, n=8 per sample), and is  
424 represented as units per area of sampled leaf tissue. (B) Protein accumulation in the  
425 tissues used to measure PDC activity shown in (A). (C-E) RipAK inhibits AtPDC2  
426 oligomerisation. AtPDC2-nLUC and cLUC-AtPDC2 were co-expressed in *N.*  
427 *benthamiana* leaves to determine AtPDC2 oligomerisation, and AtPDC2-nLUC was  
428 co-expressed with cLUC-AtSgt1a as negative control. RipAK-GFP (or GFP, as  
429 control) was co-expressed with AtPDC2-nLUC and cLUC-AtPDC2 to determine  
430 interference with AtPDC2 oligomerisation. Luciferase complementation was observed  
431 44 hpi, and is shown in (C). A colour code representing the relative luminescence is  
432 shown for reference. (D) Protein accumulation in the tissues used for Split-LUC  
433 assays. (E) Quantification of luminescence as relative luminescence units (RLU), as  
434 detailed in the methods section (mean  $\pm$  SEM, n=8 per sample). Different letters  
435 indicate significantly different values, as determined using a one-way ANOVA  
436 statistical test ( $p < 0.05$ ). The immunoblots in this figure were developed using  
437 anti-GFP, anti-FLAG, or anti-LUC antibody; the relative position of the different  
438 proteins in the blots and protein marker sizes are provided for reference. These  
439 experiments were performed 3 times with similar results.

440

441 **Figure S1. Validation of  $\Delta ripAK$  mutant strains and associated virulence**  
442 **analysis.**

443 (A) Genotyping of the  $\Delta ripAK$  mutant and  $\Delta ripAK/RipAK$  complementation strains,  
444 using GMI1000 as control. The PCR shows the presence/absence of the *ripAK*  
445 fragment in these strains. (B) The  $\Delta ripAK$  mutant and  $\Delta ripAK/RipAK$  complementation  
446 strains do not show differences in fitness compared to GMI1000 in nutrient-rich liquid  
447 medium. The different strains were inoculated in liquid Phi medium with an initial  
448 concentration of  $OD_{600}=0.02$ , and optical density was measured over time. Values  
449 represent mean  $\pm$  SEM (n=3). (C and D) RipAK contributes to *R. solanacearum*  
450 infection in Arabidopsis. Composite data from 9 independent biological repeats (a  
451 representative assay is shown in Figure 1A and 1B). All values were pooled together  
452 and represented as disease index (C) or percent survival (D). Disease index values  
453 represent mean  $\pm$  SEM (n=158). (E and F) RipAK contributes to *R. solanacearum*  
454 infection in tomato. Composite data from 5 independent biological repeats (a  
455 representative assay is shown in Figure 1C and 1D). All values were pooled together  
456 and represented as disease index (E) or percent survival (F). Disease index values  
457 represent mean  $\pm$  SEM (n=78). Statistical analysis was performed using a Log-rank  
458 (Mantel-Cox) test, and the corresponding p value is shown in the graph with the same  
459 colour as each curve. (G) The  $\Delta ripAK$  mutant and  $\Delta ripAK/RipAK$  complementation  
460 strains do not show differences in growth upon tomato stem injection compared to  
461 GMI1000. 3.5-week old tomato plants were injected with 5  $\mu$ L of a  $10^6$  cfu  $mL^{-1}$  and  
462 samples were collected 1, 2, and 3 dpi. Five independent biological repeats were  
463 performed (n=6 plants per strain in each replicate) with similar results. Values from all  
464 the replicates are represented in this graph; values with the same colour correspond  
465 to the same repeat. ns indicates no significant differences among these strains  
466 according to a Student's t test ( $p>0.05$ ).

467

468 **Figure S2. Comparison between the full RipAK reference sequence and the**  
469 **RipAK <sup>$\Delta$ 1-70</sup> truncated version.**

470 (A) Subcellular localization of RipAK-GFP, RipAK<sup>Δ1-70aa</sup>, and free GFP (as control) in  
471 *N. benthamiana* leaf cells observed using confocal microscopy upon transient  
472 expression using *A. tumefaciens*. GFP-tagged proteins were co-expressed with PTS1  
473 (peroxisome targeting signal 1) fused to Turquoise fluorescent protein to allow for  
474 visualization of peroxisomes. Bright field is provided for reference, and merged  
475 signals show the relative localization of GFP and peroxisomes-tagged proteins.  
476 Fluorescence was visualized 48 hours-post inoculation. Scale bar = 25 μm. Z-stack  
477 shows a vertical cross-section through the observed cells. (B) Western blot to  
478 determine the accumulation of GFP tagged proteins in the tissues used for confocal  
479 microscopy in (A). Samples were taken 40 hpi, immunoblots were analysed with an  
480 anti-GFP antibody, and protein marker sizes are provided for reference. (C) Diagram  
481 comparing the full RipAK version used in this work and the truncated version used in  
482 Sun et al, (2017). (D) Amino acid sequence of RipAK from different sequenced strains  
483 belonging to the phylotype I, including the reference strain GMI1000 (sequence used  
484 in this work), showing that the first 70 amino acids are present and highly conserved  
485 in different phylotype I strains. Reference sequences were retrieved from the  
486 RalstoT3E database (Peeters et al, 2013; Sabbagh et al, 2019;  
487 <https://iant.toulouse.inra.fr/bacteria/annotation/site/prj/T3Ev3/> ). (E) The full  
488 RipAK-GFP accumulates in *N. benthamiana* tissues upon transient expression using  
489 Agrobacterium. Liquid chromatography and Mass spectrometry (LC-MS) analysis was  
490 performed after GFP immunoprecipitation. The highlighted tryptic peptides were  
491 detected, representing 87% coverage of the total RipAK sequence, including peptides  
492 within the first 70 amino acids. Non-highlighted residues represent peptides that were  
493 not detected, probably due to technical reasons associated to the tryptic digestion or  
494 the LC-MS analysis.

495

### 496 **Figure S3. RipAK interacts with PDCs.**

497 (A) Phylogenetic tree of PDC proteins from Arabidopsis and tomato. Proteins  
498 annotated as “pyruvate decarboxylase” or PDC-family proteins (such as  
499 AT5G01320.1) are shown. The SIPDC identified as RipAK interactor

500 (Solyc02g077240) was annotated in this work as SIPDC2 given its high similarity with  
501 AtPDC2. The phylogenetic tree was generated using the MEGA X software using the  
502 Maximum likelihood method. The percentage of trees in which the associated taxa  
503 clustered together is shown next to the branches. (B) Co-localization of RipAK-GFP  
504 and AtPDCs tagged with a red fluorescent protein (RFP) in *N. benthamiana* leaf cells  
505 observed using confocal microscopy upon transient expression using *A. tumefaciens*.  
506 Merged signals show the relative localization of GFP and RFP-tagged proteins.  
507 Fluorescence was visualized 40 hpi. Scale bars = 100  $\mu$ m. Z-stack shows a vertical  
508 cross-section through the observed cells. (C) Protein accumulation in the tissues used  
509 to perform the Split-LUC assays shown in Figure 2C. RipAK-nLUC and cLUC-AtPDCs  
510 were co-expressed in *N. benthamiana* leaves, and cLUC-AtSgt1a was used as  
511 negative interaction control. The immunoblot was developed using anti-LUC antibody;  
512 the relative position of the different proteins in the blot and protein marker sizes are  
513 provided for reference. (D) Simplified diagram of the PDC pathway in stress  
514 conditions.

515

516 **Figure S4. Characterization of Arabidopsis *pd*c mutant lines.**

517 (A) Diagram showing the gene structure of *AtPDC1*, *AtPDC2* and *AtPDC3*. Start  
518 (ATG) and stop codons are indicated; black boxes represent coding regions, white  
519 boxes represent untranslated regions, lines represent introns, and dotted triangles  
520 show the location of the T-DNA insertions in each mutant line. F and R indicate the  
521 matching sequence of the forward and reverse primers, respectively, used for the  
522 subsequent qPCRs to determine gene expression. (B-D) Expression of *AtPDC1*,  
523 *AtPDC2*, and *AtPDC3* in *pd*c mutant lines. Values were normalized to the expression  
524 of the *AtACT2* gene (AT3G18780) and are shown relative to the expression of each  
525 *PDC* gene in Col-0 WT. Values represent mean  $\pm$  SEM (n=3). The experiments were  
526 performed 3 times with similar results. (E) Measurement of PDC activity in  
527 Arabidopsis *pd*c mutant lines, using 10 day-old seedlings. Seven independent  
528 biological repeats were performed (n=8 in each biological repeat). Values from all the  
529 repeats are represented in this graph as percentage of the PDC activity observed in

530 Col-0 WT seedlings in each repeat; values with the same colour correspond to the  
531 same repeat. Black bars represent the average values for each mutant. Although  
532 *pdc1* and *pdc3* mutants showed reduction in PDC activity in several repeats, only  
533 *pdc2* mutant seedlings showed lower PDC activity than Col-0 WT seedlings in all the  
534 repeats.

535

536 **Figure S5. PDCs contribute to plant resistance against *R. solanacearum*.**

537 (A and B) The Arabidopsis *pdc2* mutant shows enhanced susceptibility to *R.*  
538 *solanacearum* infection, and rescues the virulence attenuation of the  $\Delta$ *ripAK* mutant.  
539 Composite data from 4 independent biological repeats (a representative assay is  
540 shown in Figure 3C and 3D). All values were pooled together and represented as  
541 disease index (A) or percent survival (B). Disease index values represent mean  $\pm$   
542 SEM (n=71). (C) Expression of the *SIPDC2* gene in tomato roots expressing the  
543 *SIPDC2*-RNAi construct used in the experiments shown in Figure 3E and 3F,  
544 determined by qRT-PCR. Values were normalized to the expression of the *SIEF1 $\alpha$ -1*  
545 gene, and are shown as relative to the expression in roots expressing the empty  
546 vector (EV). Values represent mean  $\pm$  SEM (n=3 samples per genotype), and  
547 asterisks represent significant differences according to a Student's t test  
548 (\*\*\*\*P<0.0001). (D and E) *SIPDC2* contributes to resistance against *R. solanacearum*  
549 infection in tomato. Composite data from 3 independent biological repeats (a  
550 representative assay is shown in Figure 3E and 3F). All values were pooled together  
551 and represented as disease index (D) or percent survival (E). Disease index values  
552 represent mean  $\pm$  SEM (n=32). Statistical analysis was performed using a Log-rank  
553 (Mantel-Cox) test, and the corresponding p value is shown in the graph with the same  
554 colour as each curve. (F and G) Soil-drenching inoculation assays in tomato plants  
555 upon pre-treatment with a 30 mM solution of the indicated organic acids or water (as  
556 mock control). Treatments were performed by placing the pots on a layer of wet towel  
557 paper containing the organic acids for 9 days, and then washed and watered normally  
558 without treatment for 3 days before inoculation with *R. solanacearum* GMI1000 WT.  
559 Composite data from 7 independent biological repeats (a representative assay is

560 shown in Figures 3G and 3H). All values were pooled together and represented as  
561 disease index (F) or percent survival (G). Disease index values represent mean  $\pm$   
562 SEM (n=74). Statistical analysis was performed using a Log-rank (Mantel-Cox) test,  
563 and the corresponding p value is shown in the graph with the same colour as each  
564 curve. (H) Treatment with pyruvic acid or acetic acid (performed as in F) causes no  
565 differences in the growth of *R. solanacearum* GMI1000 upon stem injection. After  
566 treatments, 3.5-week old tomato plants were injected with 5  $\mu$ L of a  $10^6$  cfu mL<sup>-1</sup> and  
567 samples were collected 1, 2, and 3 dpi. Four independent biological repeats were  
568 performed (n=7 plants per treatment) with similar results. Values from all the  
569 replicates are represented in this graph; values with the same colour correspond to  
570 the same repeat. ns indicates no significant differences among these treatments  
571 according to a Student's t test ( $p > 0.05$ ).

572

573

574

575

576

577

## 578 **References**

- 579 Boller, T., and Felix, G. (2009). A renaissance of elicitors: Perception of  
580 microbe-associated molecular patterns and danger signals by pattern-recognition  
581 receptors. *Annual Review of Plant Biology*. 60(1), 379-406. DOI:  
582 10.1146/annurev.arplant.57.032905.105346.
- 583 Brito, B., Marena, M., Barberis, P., Boucher, C., and Genin, S. (1999). prhJ and  
584 hrpG, two new components of the plant signal-dependent regulatory cascade  
585 controlled by PrhA in *Ralstonia solanacearum*. *Molecular Microbiology*. 31(1),  
586 237-251. DOI: 10.1046/j.1365-2958.1999.01165.x.
- 587 Chiang, Y.-H., and Coaker, G. (2015). Effector triggered immunity: NLR immune  
588 perception and downstream defense responses. *The Arabidopsis Book*. 2015(13).  
589 DOI: 10.1199/tab.0183.
- 590 Cook, D.E., Mesarich, C.H., and Thomma, B.P.H.J. (2015). Understanding plant  
591 immunity as a surveillance system to detect invasion. *Annual Review of*  
592 *Phytopathology*. 53(1), 541-563. DOI: 10.1146/annurev-phyto-080614-120114.
- 593 Dalsing, B.L., Truchon, A.N., Gonzalez-Orta, E.T., Milling, A.S., and Allen, C. (2015).  
594 Uses inorganic nitrogen metabolism for virulence, ATP production, and detoxification  
595 in the oxygen-limited host xylem environment. *mBio*. 6(2), e02471-02414. DOI:  
596 10.1128/mBio.02471-14.
- 597 Elphinstone, J.G., Allen, C., Prior, P., and Hayward, A.C. (2005). The current bacterial  
598 wilt situation: a global overview. *World Journal of Agricultural Research*. DOI:  
599 10.12691/wjar-3-1-8.
- 600 Feng, D.X., Tasset, C., Hanemian, M., Barlet, X., Hu, J., Trémousaygue, D.,  
601 Deslandes, L., and Marco, Y. (2012). Biological control of bacterial wilt in *Arabidopsis*  
602 *thaliana* involves abscissic acid signalling. *New Phytologist*. 194(4), 1035-1045. DOI:  
603 10.1111/j.1469-8137.2012.04113.x.
- 604 Genin, S. (2010). Molecular traits controlling host range and adaptation to plants in  
605 *Ralstonia solanacearum*. *New Phytologist*. 187(4), 920-928. DOI:  
606 10.1111/j.1469-8137.2010.03397.x.
- 607 Goedhart, J., von Stetten, D., Noirclerc-Savoye, M., Lelimosin, M., Joosen, L., Hink,  
608 M.A., van Weeren, L., Gadella, T.W.J., and Royant, A. (2012). Structure-guided  
609 evolution of cyan fluorescent proteins towards a quantum yield of 93%. *Nature*  
610 *Communications*. 3(1), 751. DOI: 10.1038/ncomms1738.
- 611 Hayward, A.C. (1991). Biology and epidemiology of bacterial wilt caused by  
612 *Pseudomonas Solanacearum*. *Annual Review of Phytopathology*. 29(1), 65-87. DOI:  
613 10.1146/annurev.py.29.090191.000433.
- 614 Killenberg-Jabs, M., Jabs, A., Lilie, H., Golbik, R., and Hübner, G. (2001). Active  
615 oligomeric states of pyruvate decarboxylase and their functional characterization.  
616 *European Journal of Biochemistry*. 268(6), 1698-1704. DOI:  
617 10.1046/j.1432-1327.2001.02044.x.
- 618 Kim, J.-M., To, T.K., Matsui, A., Tanoi, K., Kobayashi, N.I., Matsuda, F., Habu, Y.,  
619 Ogawa, D., Sakamoto, T., Matsunaga, S., et al. (2017). Acetate-mediated novel  
620 survival strategy against drought in plants. *Nature Plants*. 3(7), 17097. DOI:  
621 10.1038/nplants.2017.97.

- 622 Kürsteiner, O., Dupuis, I., and Kuhlemeier, C. (2003). The pyruvate decarboxylase1  
623 gene of *Arabidopsis* is required during anoxia but not other environmental stresses.  
624 *Plant Physiology*. 132(2), 968-978. DOI: 10.1104/pp.102.016907.
- 625 Lacombe, S., Rougon-Cardoso, A., Sherwood, E., Peeters, N., Dahlbeck, D., van  
626 Esse, H.P., Smoker, M., Rallapalli, G., Thomma, B.P.H.J., Staskawicz, B., et al.  
627 (2010). Interfamily transfer of a plant pattern-recognition receptor confers  
628 broad-spectrum bacterial resistance. *Nature Biotechnology*. 28(4), 365-369. DOI:  
629 10.1038/nbt.1613.
- 630 Macho, A.P. (2016). Subversion of plant cellular functions by bacterial type-III  
631 effectors: beyond suppression of immunity. *New Phytologist*. 210(1), 51-57. DOI:  
632 10.1111/nph.13605.
- 633 Macho, A.P., and Zipfel, C. (2015). Targeting of plant pattern recognition  
634 receptor-triggered immunity by bacterial type-III secretion system effectors. *Current*  
635 *Opinion in Microbiology*. 23, 14-22. DOI: <https://doi.org/10.1016/j.mib.2014.10.009>.
- 636 Mansfield, J., Gene, S., Magori, S., Citovsky, V., Sriariyanum, M., Ronald, P., Dow,  
637 M., Verdier, V., beer, S.V., Machado, M.A., et al. (2012). Top 10 plant pathogenic  
638 bacteria in molecular plant pathology. *Molecular Plant Pathology*. 13(6), 614-629.  
639 DOI: 10.1111/j.1364-3703.2012.00804.x.
- 640 Mithran, M., Paparelli, E., Novi, G., Perata, P., and Loreti, E. (2014). Analysis of the  
641 role of the pyruvate decarboxylase gene family in *Arabidopsis thaliana* under  
642 low-oxygen conditions. *Plant Biology*. 16(1), 28-34. DOI: 10.1111/plb.12005.
- 643 Mukaiyara, T., Tamura, N., and Iwabuchi, M. (2010). Genome-wide identification of a  
644 large repertoire of *Ralstonia solanacearum* Type III Effector proteins by a new  
645 functional screen. *Molecular Plant-Microbe Interactions®*. 23(3), 251-262. DOI:  
646 10.1094/mpmi-23-3-0251.
- 647 Nicholls, P., Fita, I., and Loewen, P.C. (2000). Enzymology and structure of catalases.  
648 In: *Advances in Inorganic Chemistry*, (Academic Press), pp. 51-106.
- 649 Poueymiro, M., Cazalé, A.C., François, J.M., Parrou, J.L., Peeters, N., and Genin, S.  
650 (2014). A *Ralstonia solanacearum* Type III Effector Directs the production of the plant  
651 signal metabolite Trehalose-6-Phosphate. *mBio*. 5(6), e02065-02014. DOI:  
652 10.1128/mBio.02065-14.
- 653 Rasheed, S., Bashir, K., Kim, J.-M., Ando, M., Tanaka, M., and Seki, M. (2018). The  
654 modulation of acetic acid pathway genes in *Arabidopsis* improves survival under  
655 drought stress. *Scientific Reports*. 8(1), 7831. DOI: 10.1038/s41598-018-26103-2.
- 656 Sabbagh, C.R.R., Carrere, S., Lonjon, F., Vailleau, F., Macho, A.P., Genin, S., and  
657 Peeters, N. (2019). Pangenomic type III effector database of the plant pathogenic  
658 *Ralstonia spp.* *PeerJ*. 7, e7346. DOI: 10.7717/peerj.7346.
- 659 Sun, Y., Li, P., Deng, M., Shen, D., Dai, G., Yao, N., and Lu, Y. (2017). The *Ralstonia*  
660 *solanacearum* effector RipAK suppresses plant hypersensitive response by inhibiting  
661 the activity of host catalases. *Cellular Microbiology*. 19(8), e12736. DOI:  
662 10.1111/cmi.12736.
- 663 Toruño, T.Y., Stergiopoulos, I., and Coaker, G. (2016). Plant-pathogen effectors:  
664 Cellular probes interfering with plant defenses in spatial and temporal manners.



665 Annual Review of Phytopathology. 54(1), 419-441. DOI:  
666 10.1146/annurev-phyto-080615-100204.  
667 Valls, M., Genin, S., and Boucher, C. (2006). Integrated regulation of the Type III  
668 Secretion System and other virulence determinants in *Ralstonia solanacearum*. PLOS  
669 Pathogens. 2(8), e82. DOI: 10.1371/journal.ppat.0020082.  
670 Vasse, J., Genin, S., Frey, P., Boucher, C., and Brito, B. (2000). The hrpB and hrpG  
671 regulatory genes of *Ralstonia solanacearum* are required for different stages of the  
672 tomato root infection process. Molecular Plant-Microbe Interactions®. 13(3), 259-267.  
673 DOI: 10.1094/mpmi.2000.13.3.259.  
674 Wei, Y., Caceres-Moreno, C., Jimenez-Gongora, T., Wang, K., Sang, Y.,  
675 Lozano-Duran, R., and Macho, A.P. (2018). The *Ralstonia solanacearum* csp22  
676 peptide, but not flagellin-derived peptides, is perceived by plants from the *Solanaceae*  
677 family. Plant Biotechnology Journal. 16(7), 1349-1362. DOI: 10.1111/pbi.12874.  
678 Wu, D., von Roepenack-Lahaye, E., Buntru, M., de Lange, O., Schandry, N.,  
679 Pérez-Quintero, A.L., Weinberg, Z., Lowe-Power, T.M., Szurek, B., Michael, A.J., et  
680 al. (2019). A plant pathogen Type III Effector protein subverts translational regulation  
681 to boost host polyamine levels. Cell Host & Microbe. 26(5), 638-649.e635. DOI:  
682 <https://doi.org/10.1016/j.chom.2019.09.014>.  
683 Xian, L., Yu, G., Wei, Y., Li, Y., Xue, H., Morcillo, R., Rufián, J., and Macho, A. (2019).  
684 A bacterial effector protein hijacks plant metabolism to support bacterial nutrition.  
685 SSRN Electronic Journal. DOI: 10.2139/ssrn.3479448.  
686 Xue, H., Lozano-Durán, R., and Macho, A.P. (2020). Insights into the root invasion by  
687 the plant pathogenic bacterium *Ralstonia solanacearum*. Plants 9, 516.  
688 Yu, G., Xian, L., Xue, H., Yu, W., Rufian, J., Sang, Y., Morcillo, R., Wang, Y., and  
689 Macho, A.P. (2019). A bacterial effector protein prevents MAPK-mediated  
690 phosphorylation of SGT1 to suppress plant immunity. bioRxiv. 641241. DOI:  
691 10.1101/641241.  
692  
693

## MATERIALS AND METHODS

### KEY RESOURCES TABLE

| REAGENT or RESOURCE                                                           | SOURCE                    | IDENTIFIER     |
|-------------------------------------------------------------------------------|---------------------------|----------------|
| <b>Antibodies</b>                                                             |                           |                |
| Mouse monoclonal anti-GFP                                                     | Abiocode                  | Cat# M0802-3a  |
| Mouse monoclonal anti-FLAG                                                    | Abmart                    | Cat# M20008    |
| Rabbit polyclonal anti-Luciferase                                             | Sigma                     | Cat# L0159     |
| Mouse monoclonal anti-HA                                                      | Roche                     | Cat# 12CA5     |
| anti-Mouse IgG-Peroxidase                                                     | Sigma                     | Cat# A2554     |
| anti-Rabbit IgG-Peroxidase                                                    | Sigma                     | Cat# A0545     |
| <b>Bacterial and Virus Strains</b>                                            |                           |                |
| <i>Escherichia coli</i> DH5a                                                  | Transgen                  | CD501-3        |
| <i>Agrobacterium tumefaciens</i> GV3101                                       | Weidi Bio                 | AC1001         |
| <i>Agrobacterium tumefaciens</i> GV3101 (PMP90RK)                             | BioRc                     | Lot#20150202   |
| <i>Agrobacterium rhizogenes</i> MSU440                                        | (Morcillo et al., 2020)   | N/A            |
| <i>Ralstonia solanacearum</i> GMI1000                                         | (Salanoubat et al., 2002) | N/A            |
| <i>Ralstonia solanacearum</i> $\Delta$ ripAK                                  | This work                 | N/A            |
| <i>Ralstonia solanacearum</i> $\Delta$ ripAK/RipAK                            | This work                 | N/A            |
| <b>Chemicals, Peptides, and Recombinant Proteins</b>                          |                           |                |
| Protease Inhibitor Cocktail for plant cell and tissue extracts, DMSO solution | Sigma                     | P9599          |
| GFP-Trap_A                                                                    | Chromotek                 | Cat# gta-100   |
| XenoLight D-Luciferin                                                         | PerkinElmer               | Cat# 122799    |
| Citric Acid                                                                   | Sigma                     | Lot#SLBR3765V  |
| Sodium pyruvate                                                               | Sigma                     | Lot#SLBW6019   |
| NaDH-Na2                                                                      | Yeasen                    | Lot#N03702     |
| Alcohol Dehydrogenase (ADH)                                                   | Sigma                     | Lot#SLBH0977V  |
| Thiamine Pyrophosphate                                                        | Sangon Biotech            | Lot#TB0939     |
| Pyruvic Acid                                                                  | Sangon Biotech            | Lot#PD0452     |
| Acetic Acid                                                                   | Hushi                     | Lot#M0130-2481 |
| XenoLight D-Luciferin                                                         | PerkinElmer               | Cat# 122799    |
| <b>Critical Commercial Assays</b>                                             |                           |                |

|                                            |                                               |                   |
|--------------------------------------------|-----------------------------------------------|-------------------|
| pENTR/D-TOPO Cloning Kit                   | Invitrogen                                    | Cat#<br>K240020SP |
| Gateway LR Clonase II Enzyme Mix           | Invitrogen                                    | Cat#<br>11791100  |
| Experimental Models: Organisms/Strains     |                                               |                   |
| Arabidopsis: <i>pd1</i>                    | (Gravot et al., 2016; Stepanova et al., 2011) | N/A               |
| Arabidopsis: <i>pd2</i>                    | (Gravot et al., 2016; Stepanova et al., 2011) | N/A               |
| Arabidopsis: <i>pd3</i>                    | (Stepanova et al., 2011)                      | N/A               |
| <i>Solanum lycopersicum</i> cv. MoneyMaker | N/A                                           | N/A               |
| Primers see Table S3                       |                                               |                   |
| Recombinant DNA                            |                                               |                   |
| pENTR/D-TOPO                               | Invitrogen                                    | Cat#<br>K240020SP |
| pXCSG-HA Strep                             | (Witte et al., 2004)                          | N/A               |
| pGWB505                                    | (Nakagawa et al., 2007b)                      | N/A               |
| pGWB511                                    | (Nakagawa et al., 2007b)                      | N/A               |
| pGWB554                                    | (Nakagawa et al., 2007b)                      | N/A               |
| pGWB-nLUC                                  | (Wang et al., 2019b)                          | N/A               |
| pGWB-cLUC                                  | (Yu et al., 2019b)                            | N/A               |
| pEASYBLUNT-LB-Gm-RB                        | This work                                     | N/A               |
| pRCT-pRipAK-RipAK                          | This work                                     | N/A               |
| pGWB505-RipAK-GFP                          | This work                                     | N/A               |
| pGWB-RipAK-nLUC                            | This work                                     | N/A               |
| pGWB-cLUC-AtPDC1                           | This work                                     | N/A               |
| pGWB-cLUC-AtPDC2                           | This work                                     | N/A               |
| pGWB-cLUC-AtPDC3                           | This work                                     | N/A               |
| pGWB-AtPDC2-nLUC                           | This work                                     | N/A               |
| pXCSG-HA Strep-RipAK                       | This work                                     | N/A               |
| pXCSG-HA Strep-GFP                         | (Sang et al., 2016)                           | N/A               |
| pGWB505-AtPDC1-GFP                         | This work                                     | N/A               |
| pGWB505-AtPDC2-GFP                         | This work                                     | N/A               |
| pGWB505-AtPDC3-GFP                         | This work                                     | N/A               |
| pGWB505-SIPDC2-GFP                         | This work                                     | N/A               |

|                                |                         |                                                                                                                       |
|--------------------------------|-------------------------|-----------------------------------------------------------------------------------------------------------------------|
| pGWB511-AtPDC2-FLAG            | This work               | N/A                                                                                                                   |
| pGWB511-GUS-FLAG               | (Yu et al., 2019a)      | N/A                                                                                                                   |
| pGWB505-GFP                    | (Sang et al., 2016)     | N/A                                                                                                                   |
| pGWB554-AtPDC1-RFP             | This work               | N/A                                                                                                                   |
| pGWB554-AtPDC2-RFP             | This work               | N/A                                                                                                                   |
| pGWB554-AtPDC3-RFP             | This work               | N/A                                                                                                                   |
| pGWB-cLUC-AtSGT1a              | (Yu et al., 2019b)      | N/A                                                                                                                   |
| pK7GWIWG2_II-RedRoot           | (Morcillo et al., 2020) | N/A                                                                                                                   |
| pK7GWIWG2_II-RedRoot-SIPDC2    | This work               | N/A                                                                                                                   |
| pMD1                           | (Li et al., 2013)       | N/A                                                                                                                   |
| pMD1-PTS1- mTurquoise2         | This work               | N/A                                                                                                                   |
| <b>Software and Algorithms</b> |                         |                                                                                                                       |
| Prism 7                        | GraphPad Software       | <a href="https://www.graphpad.com/scientific-software/prism/">https://www.graphpad.com/scientific-software/prism/</a> |
| Scaffold 4.0                   | Proteome Software       | <a href="http://www.proteomesoftware.com/products/scaffold/">http://www.proteomesoftware.com/products/scaffold/</a>   |
| ImageJ                         | NIH ImageJ              | <a href="https://imagej.nih.gov/ij/">https://imagej.nih.gov/ij/</a>                                                   |
| Mega X                         | Mega X                  | <a href="https://megasoftware.net/">https://megasoftware.net/</a>                                                     |

#### **CONTACT FOR REAGENT AND RESOURCE SHARING**

Further information and requests for resources and reagents should be directed to the Lead Contact, Alberto P. Macho ([alberto.macho@sibs.ac.cn](mailto:alberto.macho@sibs.ac.cn)).

## EXPERIMENTAL MODELS AND SUBJECT DETAILS

### ***Arabidopsis thaliana***

*Arabidopsis thaliana* (*Arabidopsis*) plants used in this work were in Columbia (Col-0) background. The *pdc1* (SALK090204C) (Gravot et al., 2016; Stepanova et al., 2011), *pdc2* (CS862662) (Gravot et al., 2016; Stepanova et al., 2011), and *pdc3* (SALK087974) (Stepanova et al., 2011) mutant lines were obtained from the Nottingham Arabidopsis Stock Centre. Primers used to genotype these mutants are shown in Table S3 and their target locations in the genes are shown in Figure S4. All the experiments were performed with homozygous plants. Plants used for harvesting seeds were grown on soil in a growth chamber at 23°C, 16 h light/8 h dark, and 70% relative humidity. For PDC enzymatic analysis, seeds were germinated on solid 1/2 Murashige and Skoog (MS) medium and seedlings were grown for 10 days in a long day growth room with 23°C, 16 h light/8 h dark and 70% relative humidity. For *Ralstonia solanacearum* soil drenching assays, seeds were germinated on solid 1/2 MS medium, and seedlings were grown for 1 week before being transferred to Jiffy pots (Jiffy International, Norway). Plants were then grown for 3-4 weeks in a short day growth chamber at 23°C, 12 h light/12 h dark, and 70% relative humidity. After *R. solanacearum* inoculation, plants were transferred to a long day growth chamber at 28°C, 16 h light/8 h dark, and 75% relative humidity.

### ***Nicotiana benthamiana***

*Nicotiana benthamiana* plants were cultivated in a growth room at 23°C, 16 h light/8 h dark, and 70% relative humidity. Four-week-old *N. benthamiana* plants were used for transient expression and subsequent assays.

### ***Solanum lycopersicum***

Tomato (*Solanum lycopersicum* cv. Moneymaker) plants were grown in a long day growth chamber at 28°C, 16 h light/8 h dark, and 65% relative humidity. Seeds were germinated on soil for 10 days and then transferred to Jiffy pots for further treatment

with organic acids or *R. solanacearum* inoculation. After *R. solanacearum* inoculation, plants were transferred to a long day growth chamber at 28°C, 16 h light/8 h dark, and 75% relative humidity.

### **Bacterial strains**

*Agrobacterium tumefaciens* GV3101 or GV3101 (PMP90RK) was used for transient expression in *N. benthamiana*. *Agrobacterium rhizogenes* MSU440 for expression in tomato roots. *A. tumefaciens* strains were grown on solid LB medium plates with the appropriate antibiotics for 2 days at 28 °C, and then inoculated in liquid LB medium with appropriate antibiotics to grow overnight at 28 °C. The antibiotic concentrations used were 25 µg mL<sup>-1</sup> rifampicin, 50 µg mL<sup>-1</sup> gentamicin, 50 µg mL<sup>-1</sup> kanamycin, 50 µg mL<sup>-1</sup> spectinomycin, and 50 µg mL<sup>-1</sup> carbenicillin.

*R. solanacearum* strains were grown in the same conditions using BG medium. (Plener et al., 2012)

## **METHODS DETAILS**

### **Generation of plasmid constructs, transgenic plants, and *R. solanacearum* mutant strains**

The RipAK coding region (Rsc2359) in pDONR207 (a gift from Anne-Claire Cazale and Nemo Peeters, LIPM, Toulouse, France) was used as a template to amplify the sequence encoding the full RipAK or the truncated version lacking the 70 N-terminal amino acids (primers are detailed in Table S3). Fragments were cloned into pENTR/D-TOPO (Thermo Scientific, USA) and then subcloned into the expression vectors pGWB505 (Nakagawa et al., 2007a), pXCSG-HAStrep (Witte et al., 2004), and pGWB-cLUC/nLUC (Wang et al., 2019a; Yu et al., 2019b) via attL-attR recombinant (LR) reactions (Thermo Scientific, MA, USA). The full length of mTurquoise2 fused to a PTS1 was amplified from the pmTurquoise2-Peroxi vector (Goedhart et al., 2012) using the primers listed in Table S3. The amplified fragment was cloned into the *NotI*/*Ascl* sites of pENTR-D and then subcloned into the

expression vector pMD1 (Li et al., 2013). Arabidopsis *AtPDC1* (AT4G33070), *AtPDC2* (At5G54960), and *AtPDC3* (At5G01330) were amplified from cDNA of Arabidopsis Col-0 using the primers detailed in Table S3, cloned into pENTR-D/TOPO, and then subcloned into the expression vectors pGWB505, pGWB554, pGWB511 (Nakagawa et al., 2007a), and pGWB-cLUC/nLUC. To generate the *R. solanacearum*  $\Delta ripAK$  mutant strain, the RipAK gene was replaced by a gentamicin resistance gene as described by Zumaquero (Zumaquero et al., 2010). The RipAK flanking regions, left border (LB) and right border (RB), were amplified by PCR and recombined into pEASYBLUNT vector; subsequently, a gentamicin resistance cassette was inserted between LB and RB through *EcoR* I digestion and T4 ligation, resulting in pEASYBLUNT-LB-Gm-RB. The pEASYBLUNT-LB-Gm-RB plasmid was introduced into *R. solanacearum* GMI1000 strain by natural transformation (González et al., 2011). The  $\Delta ripAK$  mutant strain was selected with 10  $\mu\text{g mL}^{-1}$  gentamicin and confirmed using RipAK specific primers (Table S3). To generate the  $\Delta ripAK/RipAK$  complementation strain, the RipAK gene (including 253bp upstream of RipAK gene start codon ATG) was cloned into pENTR-D/TOPO, introduced into pRCT-GWY vector by LR reaction, and then transformed into the  $\Delta ripAK$  mutant strain (Henry et al., 2017). The  $\Delta ripAK/RipAK$  complementation strain was selected with 10  $\mu\text{g mL}^{-1}$  tetracycline and confirmed using RipAK specific primers (Table S3).

### **Pathogen inoculation assays**

For *R. solanacearum* soil drenching inoculation, 4.5-week old Arabidopsis (at least 20 plants per genotype) or 3.5-week old tomato plants (at least 12 plants per genotype) were used (the exact number for each experiment is indicated in the figure legend). Plants grown in Jiffy pots were inoculated by soil drenching with a bacterial suspension containing  $10^8$  colony-forming units per mL (CFU  $\text{mL}^{-1}$ ). 30 mL of inoculum of each strain was used to soak each plant. After a 20-minute incubation with the bacterial inoculum, plants were transferred from the bacterial solution to a bed of potting mixture soil in a new tray (Vaillau et al., 2007). Scoring of visual disease symptoms on the basis of a scale ranging from '0' (no symptoms) to '4'

(complete wilting) was performed as previously described (Vaillau et al., 2007). To perform survival analysis, the disease scoring was transformed into binary data with the following criteria: a disease index lower than 2 was defined as '0', while a disease index equal or higher than 2 was defined as '1' for each specific time point (days post-inoculation, dpi) (Remigi et al., 2011).

Stem injection assays were performed as previously described (Yu et al., 2019b). Briefly, 5  $\mu\text{L}$  of a  $10^6$  CFU  $\text{mL}^{-1}$  bacterial suspension was injected into the stems of 4-week-old tomato plants and 2.5  $\mu\text{L}$  of xylem sap was collected from each plant for bacterial number quantification at the indicated times. Injections were performed 2 cm below the cotyledon emerging site in the stem, and the samples were taken at the cotyledon emerging site.

To measure PDC activity upon bacterial inoculation, *Arabidopsis* seedlings were grown on 1/2 MS solid medium plates for one week. Seedlings were inoculated by placing 10  $\mu\text{L}$  of a bacterial inoculum containing  $10^5$  CFU  $\text{mL}^{-1}$  of *R. solanacearum* inoculation on the root tip of each seedling. Seedlings were collected 1, 2, or 3 dpi for PDC activity measurement. Tomato plants were inoculated by stem injection as described above, and samples for PDC enzymatic assay were taken and frozen in liquid nitrogen at 1, 2, and 3 dpi.

### **RNAi in tomato roots**

To generate the *SIPDC2* RNAi construct, a 204bp fragment of tomato *SIPDC2* (*Solyc02g077240*) was amplified from cDNA of tomato cv. MoneyMaker using the primers detailed in Table S3, cloned into pENTR-D/TOPO, and then subcloned into the expression vector pK7GWIWG2\_II-RedRoot (<http://gateway.psb.ugent.be>). The *SIPDC2* cloned fragment shares 81%, 81%, and 84% homology to the respective fragments of *Solyc09g005110*, *Solyc06g082130*, and *Solyc10g076510*, respectively, which are also annotated as SIPDCs (Figure S3).



The generation of tomato plants with transgenic roots was performed as previously described (Morcillo et al., 2020). Briefly, the radicles of tomato seedlings were cut, and the resulting hypocotyls were dipped in *Agrobacterium rhizogenes* MSU440 containing pK7GWIWG2\_II-RedRoot::*SIPDC2* or pK7GWIWG2\_II-RedRoot (used as control). The seedlings were then incubated to allow the growth of transgenic roots. Three weeks after transformation, seedlings were transferred to Jiffy pots, and soil-drenching inoculation with *R. solanacearum* (OD<sub>600</sub> of 0.1) was performed three-to-four weeks later as described above. Symptoms were scored as described above. The efficiency of the *SIPDC2* silencing was determined by qRT PCR, and shown in the figure S5.

### **Transient expression in *N. benthamiana***

Transient expression in *N. benthamiana* was performed as previously described (Sang et al., 2016). Briefly, *A. tumefaciens* strains carrying the indicated constructs were infiltrated into leaves of 4.5-week-old *N. benthamiana* using an OD<sub>600</sub> of 0.5. To prepare the inoculum, *A. tumefaciens* was incubated in infiltration buffer (10 mM MgCl<sub>2</sub>, 10 mM MES pH 5.6, and 150 μM acetosyringone) for 2 h before infiltration. The constructs used as controls for transient expression in *N. benthamiana* were: GFP (Sang et al., 2016), cLUC-AtSGT1a and GUS-FLAG (Yu et al., 2019a).

### **Confocal microscopy**

Confocal microscopy was performed as previously described (Wang et al., 2019a). Briefly, to determine the subcellular localization of tagged proteins, leaf discs were collected from *N. benthamiana* leaves 2 dpi with *A. tumefaciens*, and observed using a Leica TCS SP8 (Leica, Germany) confocal microscope with the following excitation wavelengths: GFP, 488 nm; RFP, 561 nm; Turquoise, 442 nm, and the respective emission wavelengths: GFP, 500-550nm; RFP, 580-610; Turquoise, 455-490 nm.

### **Protein extraction and western blots**

Protein extraction and western blots were performed as previously described (Sang et al., 2016) with several modifications. Briefly, plant tissues were collected into 2 mL tubes with metal beads and frozen in liquid nitrogen before grinding using a tissue lyser (Qiagen, Germany) for 1 min at 25 rpm/s. Proteins were then extracted using protein extraction buffer (100 mM Tris-HCl, pH7.5; 10% glycerol; 1% NP40, 5 mM EDTA; 5 mM DTT, 1% Protease inhibitor cocktail, 2 mM PMSF, 10 mM sodium molybdate, 10 mM sodium fluoride, 2 mM sodium orthovanadate) and incubated for 10 min on ice. After centrifugation (10 min; 16,000 g), the supernatants were mixed with SDS loading buffer, denatured at 70 °C for 20 min, and resolved using SDS-PAGE. Proteins were transferred to a PVDF membrane and monitored by western blot using the antibodies indicated in KEY RESOURCES TABLE.

### **Immunoprecipitation**

Co-immunoprecipitation assays were performed as previously described (Sang et al., 2016) with several modifications. Briefly, *N. benthamiana* leaves were infiltrated with *A. tumefaciens* containing the indicated constructs. Total proteins (0.75 g tissue per sample) were extracted as indicated above and immunoprecipitation was performed with 15 µL of GFP-trap beads (ChromoTek, Germany) during a 1-hour incubation at 4 °C. Beads were washed 4 times with wash buffer containing 0.2% NP40. The proteins were stripped from the beads by heating in 30 µL Laemmli buffer for 20 minutes at 75 °C. The immunoprecipitated proteins were separated on SDS-PAGE gels for western blot analysis with the indicated antibodies. The LC-MSMS analysis of immunoprecipitated RipAK-GFP was performed as previously described (Sang et al., 2016)(Sang et al, 2016).

### **Split-LUC analysis**

Split-LUC assays were performed as previously described (Chen et al., 2008; Wang et al., 2019a) with several modifications. Briefly, *A. tumefaciens* strains containing the indicated constructs were infiltrated into *N. benthamiana* leaves. A construct

containing cLUC-AtSgt1a (Yu et al., 2019b) was used as negative control. Split-LUC assays were performed 44 hours post-inoculation (hpi) for RipAK-PDC interaction or 40 hpi for PDC oligomerisation. For CCD imaging, the leaves were infiltrated with 0.1 mM luciferin in water and kept in the dark for 5 min to reduce the background signal before the analysis. The images were taken with either Lumazone 1300B (Scientific Instrument, USA) or NightShade LB 985 (Berthold, Germany). Image J software was used to quantify the luciferase signal. The protein accumulation was determined by immunoblot as described above.

### **RNA extraction and quantitative RT-PCR**

For RNA extraction, plant tissues were collected in 1.5 mL microfuge tubes with one metal bead and the tubes were immediately placed into liquid nitrogen. Samples were ground thoroughly using a tissue lyser for 1 minute, and placed back in liquid nitrogen. Total RNA was extracted with the E.Z.N.A. Plant RNA kit (Biotek, China) without DNA digestion according to the manufacturer's manual. RNA samples were quantified with Nanodrop spectrophotometer (ThermoFisher, USA). The first strand cDNA was synthesized with the iScript gDNA Clear cDNA Synthesis Kit (Bio-Rad) using 1 µg RNA. Quantitative RT-PCR (RT-qPCR) was performed using the iTaq™ Universal SYBR Green Supermix (Bio-Rad, USA) and CFX96 Real-time system (Bio-Rad, USA). Primers are listed in Table S3.

### **Yeast two-hybrid**

Yeast two-hybrid screening was performed by Hybrigenics Services (Evry, France). The coding sequence of full-length RipAK was PCR-amplified and cloned into pB29 as an N-terminal fusion to LexA (RipAK-LexA). The construct was checked by sequencing the entire insert and used as a bait to screen a random-primed tomato roots (*R. solanacearum* and *Meloidogyne incognita*) cDNA library constructed into pP6. pB29 and pP6 derive from the original pBTM116 (Béranger et al., 1997; Vojtek and Hollenberg, 1995) and pGADGH (Bartel et al., 1993) plasmids, respectively. 90 million clones (9-fold the complexity of the library) were screened using a mating

approach with YHGX13 (Y187 *ade2-101::loxP-kanMX-loxP*, *mat $\alpha$* ) and L40 $\Delta$ Gal4 (*mata*) yeast strains as previously described (Fromont-Racine et al., 1997). 167 His<sup>+</sup> colonies were selected on a medium lacking tryptophan, leucine, and histidine. The prey fragments of the positive clones were amplified by PCR and sequenced at their 5' and 3' junctions. Only high-confidence clones were considered. The resulting sequences were used to identify the corresponding interacting proteins in the GenBank database (NCBI) using a fully automated procedure.

### **PDC activity measurements**

PDC activity was determined as described by Boeckx (Boeckx et al., 2017). Plant tissues were ground and homogenized in extraction buffer containing 100 mM 2-(N-morpholino) ethane sulfonic acid (MES) buffer (pH 7.5), 5 mM dithiothreitol (DTT) and 2.5% (w/v) polyvinylpyrrolidone (PVP) and 0.02% (w/v) Triton X-100. For *Arabidopsis* seedlings, fresh tissues were weighed before being frozen in liquid nitrogen. Samples were ground using a tissue lyser and the extraction was performed using a proportion of 3:1 (v/w) to plant tissue. For *N. benthamiana* leaf tissue, 30 leaf discs per sample (7 mm diameter each) were collected, and 700  $\mu$ L of extraction buffer were added to each sample. Plant crude extracts were incubated at 4°C for 15 minutes, and then were centrifuged at 16000 g for 20 minutes. Then, 50  $\mu$ L of the supernatants were added to 150  $\mu$ L of enzymatic analysis buffer, containing 10 mM MES buffer (pH 6.5), 10  $\mu$ L 50  $\mu$ M thiamine pyrophosphate (TPP), 50 mM magnesium chloride (MgCl<sub>2</sub>), 50 Units commercial Alcohol Dehydrogenase (ADH) solution (Sigma, USA), 50 mM sodium pyruvate, and 0.8 mM NADH (Yeasen, China). Samples and buffer were mixed in 96-well transparent plates, 8 technical replicates were performed for each sample, and the oxidation of NADH was measured by continuously recording the decrease in absorbance at 340 nm using a Varioskan flash microplate luminescence reader (ThermoFisher, Germany) at 37°C for 90 minutes (1 measurement per minute). Within 90 minutes, the decrease of NADH usually reached a steady basal level. Enzymatic activity was calculated using the data corresponding to the linear section of the curve as described by Boeckx (Boeckx et al., 2017).

### **Treatments with organic acids**

Organic acid treatments were performed as previously described (Kim et al., 2017), with several modifications. Briefly, two week-old tomato plants grown on Jiffy pots were pre-treated with 30 mM citric acid, pyruvic acid, acetic acid, or formic acid using 10 mL per plant every day for 9 days. The organic acids were applied by soaking a paper towel located below the Jiffy pots, so that they were absorbed by capillarity. After 9 days, Jiffy pots were washed with water gently without damaging the roots for several times to remove the remaining acids from the soil, and plants were watered without organic acids for 3 days before inoculation with *R. solanacearum*.

### **Sequence analysis**

The PDC protein sequences from different plant species were retrieved from NCBI (<https://www.ncbi.nlm.nih.gov>), SolGenomics (<https://solgenomics.net>) and TAIR ([www.arabidopsis.org](http://www.arabidopsis.org)). To generate the phylogenetic tree, PDC protein sequences were aligned using MEGA X software, using the Maximum likelihood computation method.

### **Statistical analysis**

Statistical analyses were performed with the Prism 7.0 software (GraphPad). The data are presented as mean  $\pm$  SEM. The statistical analyses used are described in the figure legends.

## Methods References

Bartel, P., Chien, C.T., Sternglanz, R., and Fields, S. (1993). Elimination of false positives that arise in using the two-hybrid system. *BioTechniques*. 14(6), 920-924. Published online 1993/06/01.

Béranger, F., Aresta, S., de Gunzburg, J., and Camonis, J. (1997). Getting more from the two-hybrid system: N-terminal fusions to LexA are efficient and sensitive baits for two-hybrid studies. *Nucleic Acids Research*. 25(10), 2035-2036. DOI: 10.1093/nar/25.10.2035.

Boeckx, J., Hertog, M., Geeraerd, A., and Nicolai, B. (2017). Kinetic modelling: an integrated approach to analyze enzyme activity assays. *Plant Methods*. 13(1), 69. DOI: 10.1186/s13007-017-0218-y.

Chen, H., Zou, Y., Shang, Y., Lin, H., Wang, Y., Cai, R., Tang, X., and Zhou, J.-M. (2008). Firefly luciferase complementation imaging assay for Protein-Protein Interactions in Plants. *Plant Physiology*. 146(2), 368-376. DOI: 10.1104/pp.107.111740.

Fromont-Racine, M., Rain, J.-C., and Legrain, P. (1997). Toward a functional analysis of the yeast genome through exhaustive two-hybrid screens. *Nature Genetics*. 16(3), 277-282. DOI: 10.1038/ng0797-277.

Goedhart, J., von Stetten, D., Noirclerc-Savoye, M., Lelimosin, M., Joosen, L., Hink, M.A., van Weeren, L., Gadella, T.W.J., and Royant, A. (2012). Structure-guided evolution of cyan fluorescent proteins towards a quantum yield of 93%. *Nature Communications*. 3(1), 751. DOI: 10.1038/ncomms1738.

González, A., Plener, L., Restrepo, S., Boucher, C., and Genin, S. (2011). Detection and functional characterization of a large genomic deletion resulting in decreased pathogenicity in *Ralstonia solanacearum* race 3 biovar 2 strains. *Environmental Microbiology*. 13(12), 3172-3185. DOI: 10.1111/j.1462-2920.2011.02636.x.

Gravot, A., Richard, G., Lime, T., Lemarié, S., Jubault, M., Lariagon, C., Lemoine, J., Vicente, J., Robert-Seilaniantz, A., Holdsworth, M.J., et al. (2016). Hypoxia response in Arabidopsis roots infected by *Plasmodiophora brassicae* supports the development of clubroot. *BMC Plant Biology*. 16(1), 251. DOI: 10.1186/s12870-016-0941-y.

Henry, E., Toruño, T.Y., Jauneau, A., Deslandes, L., and Coaker, G. (2017). Direct and indirect visualization of bacterial effector delivery into diverse plant cell types during infection. *The Plant Cell*. 29(7), 1555-1570. DOI: 10.1105/tpc.17.00027.

Kim, J.-M., To, T.K., Matsui, A., Tanoi, K., Kobayashi, N.I., Matsuda, F., Habu, Y., Ogawa, D., Sakamoto, T., Matsunaga, S., et al. (2017). Acetate-mediated novel survival strategy against drought in plants. *Nature Plants*. 3(7), 17097. DOI: 10.1038/nplants.2017.97.

Li, J., Carlson, B.E., and Laciš, A.A. (2013). Application of spectral analysis techniques in the intercomparison of aerosol data: 1. An EOF approach to analyze the spatial-temporal variability of aerosol optical depth using multiple remote sensing data sets. *Journal of Geophysical Research: Atmospheres*. 118(15), 8640-8648. DOI: 10.1002/jgrd.50686.

Morcillo, R.J.L., Zhao, A., Tamayo-Navarrete, M.I., García-Garrido, J.M., and Macho, A.P. (2020). Tomato root transformation followed by inoculation with *Ralstonia Solanacearum* for straightforward genetic analysis of bacterial wilt disease. *JoVE*. (157), e60302. DOI: doi:10.3791/60302.

Nakagawa, T., Suzuki, T., Murata, S., Nakamura, S., Hino, T., Maeo, K., Tabata, R., Kawai, T., Tanaka, K., and Niwa, Y. (2007a). Improved gateway binary vectors: High-performance vectors for creation of fusion constructs in transgenic analysis of plants. *Bioscience, Biotechnology, and Biochemistry*. 71(8), 2095-2100.

Nakagawa, T., Suzuki, T., Murata, S., Nakamura, S., Hino, T., Maeo, K., Tabata, R., Kawai, T., Tanaka, K., Niwa, Y., et al. (2007b). Improved gateway binary vectors: high-performance vectors for creation of fusion constructs in transgenic analysis of plants. *Bioscience, Biotechnology, and Biochemistry*. 71(8), 2095-2100. DOI: 10.1271/bbb.70216.

Plener, L., Boistard, P., González, A., Boucher, C., and Genin, S. (2012). Metabolic adaptation of *Ralstonia solanacearum* during plant infection: A methionine biosynthesis case study. *PLOS ONE*. 7(5), e36877. DOI: 10.1371/journal.pone.0036877.

Remigi, P., Anisimova, M., Guidot, A., Genin, S., and Peeters, N. (2011). Functional diversification of the GALA type III effector family contributes to *Ralstonia solanacearum* adaptation on different plant hosts. *New Phytologist*. 192(4), 976-987. DOI: 10.1111/j.1469-8137.2011.03854.x.

Salanoubat, M., Genin, S., Artiguenave, F., Gouzy, J., Mangenot, S., Arlat, M., Billault, A., Brottier, P., Camus, J.C., Cattolico, L., et al. (2002). Genome sequence of the plant pathogen *Ralstonia solanacearum*. *Nature*. 415(6871), 497-502.

Sang, Y., Wang, Y., Ni, H., Cazalé, A.-C., She, Y.-M., Peeters, N., and Macho, A.P. (2016). The *Ralstonia solanacearum* type III effector RipAY targets plant redox regulators to suppress immune responses. *Molecular Plant Pathology*. 19(1), 129-142. DOI: 10.1111/mpp.12504.

Stepanova, A.N., Yun, J., Robles, L.M., Novak, O., He, W., Guo, H., Ljung, K., and Alonso, J.M. (2011). The Arabidopsis YUCCA1 Flavin Monooxygenase Functions in the Indole-3-Pyruvic Acid Branch of Auxin Biosynthesis. *The Plant Cell*. 23(11), 3961-3973. DOI: 10.1105/tpc.111.088047.

Vailleau, F., Sartorel, E., Jardinaud, M.-F., Chardon, F., Genin, S., Huguet, T., Gentzbittel, L., and Petitprez, M. (2007). Characterization of the interaction between the bacterial wilt pathogen *Ralstonia solanacearum* and the model legume plant *Medicago truncatula*. *Molecular Plant-Microbe Interactions*®. 20(2), 159-167. DOI: 10.1094/mpmi-20-2-0159.

Vojtek, A.B., and Hollenberg, S.M. (1995). Ras-Raf interaction: Two-hybrid analysis. In: *Methods in Enzymology*, (Academic Press), pp. 331-342.

Wang, Y., Li, Y., Rosas-Diaz, T., Caceres-Moreno, C., Lozano-Duran, R., and Macho, A.P. (2019a). The IMMUNE-ASSOCIATED NUCLEOTIDE-BINDING 9 protein is a regulator of basal immunity in *Arabidopsis thaliana*. *Molecular Plant-Microbe Interactions*®. 32(1), 65-75. DOI: 10.1094/mpmi-03-18-0062-r.

Wang, Y., Li, Y., Rosas-Diaz, T., Caceres-Moreno, C., Lozano-Durán, R., and Macho, A.P. (2019b). The IMMUNE-ASSOCIATED NUCLEOTIDE-BINDING 9 protein is a regulator of basal immunity in *Arabidopsis thaliana*. *Molecular Plant-Microbe Interactions*. 32(1), 65-75. DOI: 10.1094/MPMI-03-18-0062-R.



Witte, C., Noel, L.D., Gielbert, J., Parker, J.E., and Romeis, T. (2004). Rapid one-step protein purification from plant material using the eight-amino acid StrepII epitope. *Plant Molecular Biology*. 55(1), 135-147.

Yu, G., Xian, L., Sang, Y., and Macho, A.P. (2019a). Cautionary notes on the use of *Agrobacterium*-mediated transient gene expression upon SGT1 silencing in *Nicotiana benthamiana*. *New Phytologist*. 222(1), 14-17. DOI: 10.1111/nph.15601.

Yu, G., Xian, L., Xue, H., Yu, W., Rufian, J., Sang, Y., Morcillo, R., Wang, Y., and Macho, A.P. (2019b). A bacterial effector protein prevents MAPK-mediated phosphorylation of SGT1 to suppress plant immunity. *bioRxiv*. 641241. DOI: 10.1101/641241.

Zumaquero, A., Macho, A.P., Rufián, J.S., and Beuzón, C.R. (2010). Analysis of the role of the Type III Effector inventory of *Pseudomonas syringae* pv. *phaseolicola* 1448a in interaction with the plant. *Journal of Bacteriology*. 192(17), 4474-4488. DOI: 10.1128/jb.00260-10.

**Table S1. Pyruvate decarboxylase clones identified in the Y2H screen.**

| <b>Gene ID</b>                              | <b>Start</b> | <b>Stop</b> |
|---------------------------------------------|--------------|-------------|
| <i>Solanum lycopersicum</i> - 02g077240.2.1 | -40          | 266         |
| <i>Solanum lycopersicum</i> - 02g077240.2.1 | -40          | 209         |
| <i>Solanum lycopersicum</i> - 02g077240.2.1 | -40          | 209         |
| <i>Solanum lycopersicum</i> - 02g077240.2.1 | -40          | 209         |
| <i>Solanum lycopersicum</i> - 02g077240.2.1 | -37          | 272         |
| <i>Solanum lycopersicum</i> - 02g077240.2.1 | -31          | 266         |
| <i>Solanum lycopersicum</i> - 02g077240.2.1 | -31          | 269         |
| <i>Solanum lycopersicum</i> - 02g077240.2.1 | -31          | 266         |
| <i>Solanum lycopersicum</i> - 02g077240.2.1 | -31          | 206         |
| <i>Solanum lycopersicum</i> - 02g077240.2.1 | -31          | 266         |
| <i>Solanum lycopersicum</i> - 02g077240.2.1 | -31          | 266         |
| <i>Solanum lycopersicum</i> - 02g077240.2.1 | -31          | 266         |
| <i>Solanum lycopersicum</i> - 02g077240.2.1 | -31          | 266         |
| <i>Solanum lycopersicum</i> - 02g077240.2.1 | -31          | 269         |
| <i>Solanum lycopersicum</i> - 02g077240.2.1 | -31          | 206         |
| <i>Solanum lycopersicum</i> - 02g077240.2.1 | -31          | 270         |
| <i>Solanum lycopersicum</i> - 02g077240.2.1 | -28          | 266         |
| <i>Solanum lycopersicum</i> - 02g077240.2.1 | -28          | 266         |
| <i>Solanum lycopersicum</i> - 02g077240.2.1 | -28          | 266         |
| <i>Solanum lycopersicum</i> - 02g077240.2.1 | -28          | 266         |
| <i>Solanum lycopersicum</i> - 02g077240.2.1 | -28          | 266         |
| <i>Solanum lycopersicum</i> - 02g077240.2.1 | -25          | 158         |
| <i>Solanum lycopersicum</i> - 02g077240.2.1 | -22          | 269         |
| <i>Solanum lycopersicum</i> - 02g077240.2.1 | -22          | 269         |
| <i>Solanum lycopersicum</i> - 02g077240.2.1 | -22          | 272         |
| <i>Solanum lycopersicum</i> - 02g077240.2.1 | -22          | 272         |
| <i>Solanum lycopersicum</i> - 02g077240.2.1 | -22          | 265         |
| <i>Solanum lycopersicum</i> - 02g077240.2.1 | -22          | 272         |
| <i>Solanum lycopersicum</i> - 02g077240.2.1 | -22          | 272         |
| <i>Solanum lycopersicum</i> - 02g077240.2.1 | -22          | 272         |
| <i>Solanum lycopersicum</i> - 02g077240.2.1 | -22          | 269         |
| <i>Solanum lycopersicum</i> - 02g077240.2.1 | -31          | 269         |
| <i>Solanum lycopersicum</i> - 02g077240.2.1 | -31          | 206         |
| <i>Solanum lycopersicum</i> - 02g077240.2.1 | -31          | 270         |
| <i>Solanum lycopersicum</i> - 02g077240.2.1 | -28          | 266         |
| <i>Solanum lycopersicum</i> - 02g077240.2.1 | -28          | 266         |
| <i>Solanum lycopersicum</i> - 02g077240.2.1 | -28          | 266         |
| <i>Solanum lycopersicum</i> - 02g077240.2.1 | -28          | 266         |
| <i>Solanum lycopersicum</i> - 02g077240.2.1 | -25          | 158         |
| <i>Solanum lycopersicum</i> - 02g077240.2.1 | -22          | 269         |
| <i>Solanum lycopersicum</i> - 02g077240.2.1 | -22          | 269         |
| <i>Solanum lycopersicum</i> - 02g077240.2.1 | -22          | 272         |
| <i>Solanum lycopersicum</i> - 02g077240.2.1 | -22          | 272         |
| <i>Solanum lycopersicum</i> - 02g077240.2.1 | -22          | 265         |
| <i>Solanum lycopersicum</i> - 02g077240.2.1 | -22          | 272         |
| <i>Solanum lycopersicum</i> - 02g077240.2.1 | -22          | 272         |
| <i>Solanum lycopersicum</i> - 02g077240.2.1 | -22          | 272         |
| <i>Solanum lycopersicum</i> - 02g077240.2.1 | -22          | 269         |
| <i>Solanum lycopersicum</i> - 02g077240.2.1 | -4           | 199         |

Gene IDs of the tomato fragments identified by Y2H, as explained in the methods section. Only high-confidence clones are represented. "Start"- "Stop" corresponds to the nucleotide sequence found in the clone compared to the gene coding sequence.

**Table S2. The expression of several *PDC* orthologs in different plant species is up-regulated upon *R. solanacearum* inoculation.**

| Plant Species | Inoculated strain | Description                          | Gene ID        | Gene name   | Fold change upon inoculation (log2) | Reference           |
|---------------|-------------------|--------------------------------------|----------------|-------------|-------------------------------------|---------------------|
| Mango ginger  | GMI1000           | Susceptible plant vs resistant plant | -              | <i>PDC1</i> | 5.78                                | Prasath et al, 2014 |
| Peanut        | GMI1000           | 24 hpi vs 1 hpi                      | ahy126668      | <i>PDC1</i> | 10.95                               | Wang et al, 2018    |
| Tomato        | K60               | 24 hpi vs mock                       | Solyc09g005110 | <i>PDC</i>  | 3.72                                | French et al, 2017  |
| Tomato        | K60               | 24 hpi vs mock                       | Solyc10g076510 | <i>PDC</i>  | 3.05                                | French et al, 2017  |
| Arabidopsis   | GMI1000           | 48 hpi vs mock                       | AT4G33070      | <i>PDC1</i> | 3.04                                | Zhao et al, 2019    |

**Table S3. Primers used in this study**

| Primer name         | Primer sequence                         | Notes <sup>1</sup>                              |
|---------------------|-----------------------------------------|-------------------------------------------------|
| RipAK-1-F           | CACCATGCGCCCTACCGCCCTCG                 | Clone RipAK full gene                           |
| RipAK-2427-R        | CAGGTGCGCGATGGCTCGGCGA                  |                                                 |
| RipAK-LB-F          | CAGAAACCGGTACTGGCCACGG                  | Clone RipAK LB region                           |
| RipAK-LB-R          | AGCATCCGGGAATTCTCGTTCCTCCCTGCTCGGGG     |                                                 |
| RipAK-RB-F          | AAGGAACGAGAATTCCCGGATGCTTCCTCAGCGAG     | Clone RipAK RB region                           |
| RipAK-RB-R          | GCTTCTCGTGGGGCCAGTG                     |                                                 |
| RipAK-(-253)-F      | CACCGGGCGCTGCCGAACCCGGT                 | Clone RipAK full gene including promoter region |
| RipAK-R             | TTACAGGTGCGCGATGGCTCGGCGAAAT            |                                                 |
| RipAK-358-F         | CACCCCGGCGGAGGTGGTCCGCCAGC              | Genotyping of $\Delta$ ripAK mutant strain      |
| RipAK-1993-R        | CGGCAAGGCGAGACTCAAGCCGCT                |                                                 |
| RipAK-211-F         | CACCATGTTGCACGGGCAGGCGCTGTCCG           | Clone truncated RipAK                           |
| AtPDC1-1-F          | CACCATGGACACCAAAATCGGATCG               | Clone <i>AtPDC1</i> full CDS                    |
| AtPDC1-1821-R       | CTGAGGATTGGGAGGACGGCT                   |                                                 |
| AtPDC2-1-F          | CACCATGGACACTAAGATCGGATCTATC            | Clone <i>AtPDC2</i> full CDS                    |
| AtPDC2-1821-R       | CTGCGGATTTGGGGGACGACTAT                 |                                                 |
| AtPDC3-1-F          | CACCATGGACGTCCGAAGTCTACCA               | Clone <i>AtPDC3</i> full CDS                    |
| AtPDC3-1776-R       | CTGAGGATTGGGAGGACGAC                    |                                                 |
| SIPDC2-1-F          | CACCATGGAAGGTAACAATGCCATCG              | Clone <i>SIPDC2</i> full CDS                    |
| SIPDC2-1761-R       | CTGAGGATTAGGAGGACGGCTAT                 |                                                 |
| AtPDC1-204-LP       | CACTTAGCTCGTCGTCTCGTC                   | <i>pdc1</i> mutant genotyping                   |
| AtPDC1-204-RP       | TGGACCTGCAAAAATGTAAGC                   |                                                 |
| AtPDC2-c05-LP       | TCCTGGTGATTTCAACCTGAC                   | <i>pdc2</i> mutant genotyping                   |
| AtPDC2-c05-RP       | CATGGCTTGAGCATAGCCTAG                   |                                                 |
| AtPDC3-974-LP       | TCCAACGATTTTGGCACTAAC                   | <i>pdc3</i> mutant genotyping                   |
| AtPDC3-974-RP       | AGGCCATAAATCATCTCAGG                    |                                                 |
| LB1.3               | ATTTTGCCGATTTCCGGAAC                    | Genotyping                                      |
| LB                  | TAGCATCTGAATTTTCATAACCAATCTCGATACAC     |                                                 |
| AtPDC1-1263-F       | GGGTGAAGCGTAACGAGACT                    | qPCR (101.4%)                                   |
| AtPDC1-1423-R       | GGTTTCAGCAATCACAGCGG                    |                                                 |
| AtPDC2-967-F        | GCTTATCTGTTTGCAGGTCCG                   | qPCR (93.7%)                                    |
| AtPDC2-1101 -R      | AACACATCCAACGCAGGTC                     |                                                 |
| AtPDC3-873-F        | GGGAGCAGTGAGCACTCTTT                    | qPCR (90.9%)                                    |
| AtPDC3-1071-R       | GAATTCGCTCATCCGAACGC                    |                                                 |
| AtACT2-F            | CTAAGCTCTCAAGATCAAAGGCTTA               | qPCR (89.6%) (McKinney & Meagher, 1998)         |
| AtACT2-R            | ACTAAAACGCAAAACGAAAGCGGTT               |                                                 |
| SIPDC2 RNAi-F       | CACCATGCTATTGCTGGGGCATAACAGTG           | Silencing <i>SIPDC2</i> in tomato roots         |
| SIPDC2 RNAi-R       | TATCAATCAATTCATGTGCATC                  |                                                 |
| SIPDC2-F            | CTCCAAAGGTCAGCAATCAA                    | qPCR (91.0%)                                    |
| SIPDC2-R            | CCTTTTGTGCTTTTCCCACT                    |                                                 |
| SIEF1 $\alpha$ -1-F | GGTGGCGAGCATGATTTTGA                    | qPCR (88.7%)                                    |
| SIEF1 $\alpha$ -1-R | CGAGCCAACCATGGAAAACAA                   |                                                 |
| mTurq PTS1 Fw       | AAGCGGCCGCATGGTGAGCAAGGGCGAGGAGC        | Clone mTurquoise-PTS1                           |
| mTurq PTS1 Rv       | AAGGCGCGCCCTTAGAGGCGGGACTTGTACAGCTCGTCC |                                                 |

<sup>1</sup> Notes include the purpose of the specific primer. Primers for qPCR include the primer efficiency in brackets.

Figure 1

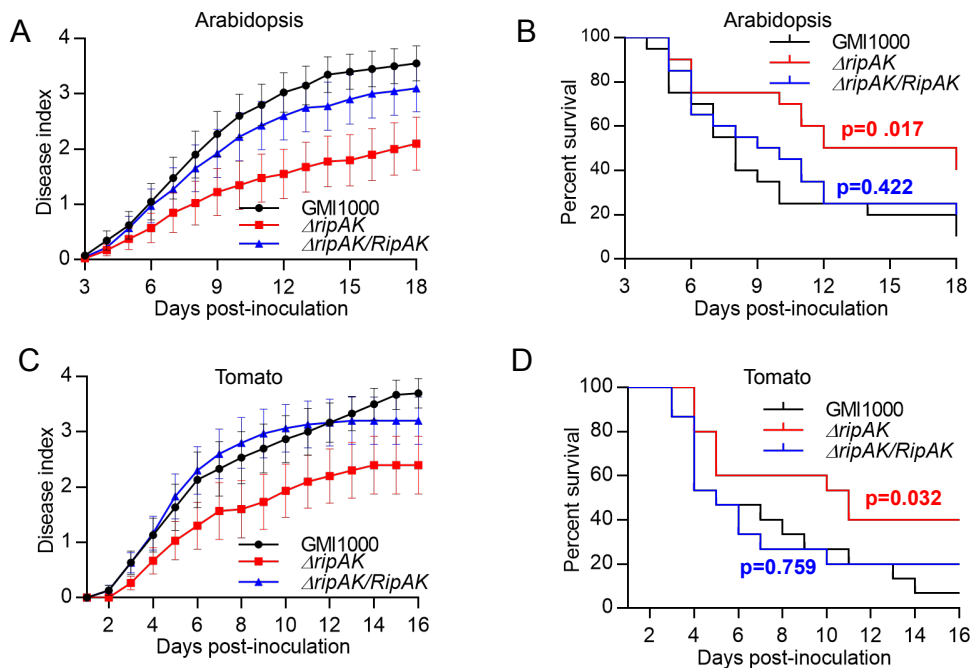

**Figure 1. RipAK contributes to *R. solanacearum* infection.**

*R. solanacearum* soil-drenching inoculation assays in Arabidopsis (A, B) and tomato (C, D) performed with GMI1000 WT,  $\Delta ripAK$  mutant, and RipAK complementation ( $\Delta ripAK/RipAK$ ) strains.  $n \geq 15$  plants per genotype (for Arabidopsis) or  $n \geq 12$  plants per genotype (for tomato). In A and C, the results are represented as disease progression, showing the average wilting symptoms in a scale from 0 to 4 (mean  $\pm$  SEM). B and D show the survival analysis of the data in A and C, respectively; the disease scoring was transformed into binary data with the following criteria: a disease index lower than 2 was defined as '0', while a disease index equal or higher than 2 was defined as '1' for each specific time point. Statistical analysis was performed using a Log-rank (Mantel-Cox) test, and the corresponding p value is shown in the graph with the same colour as each curve. Nine and five independent biological replicates were performed for inoculations in Arabidopsis and tomato, respectively, and composite data representations are shown in Figure S1C-F.

## Figure 2

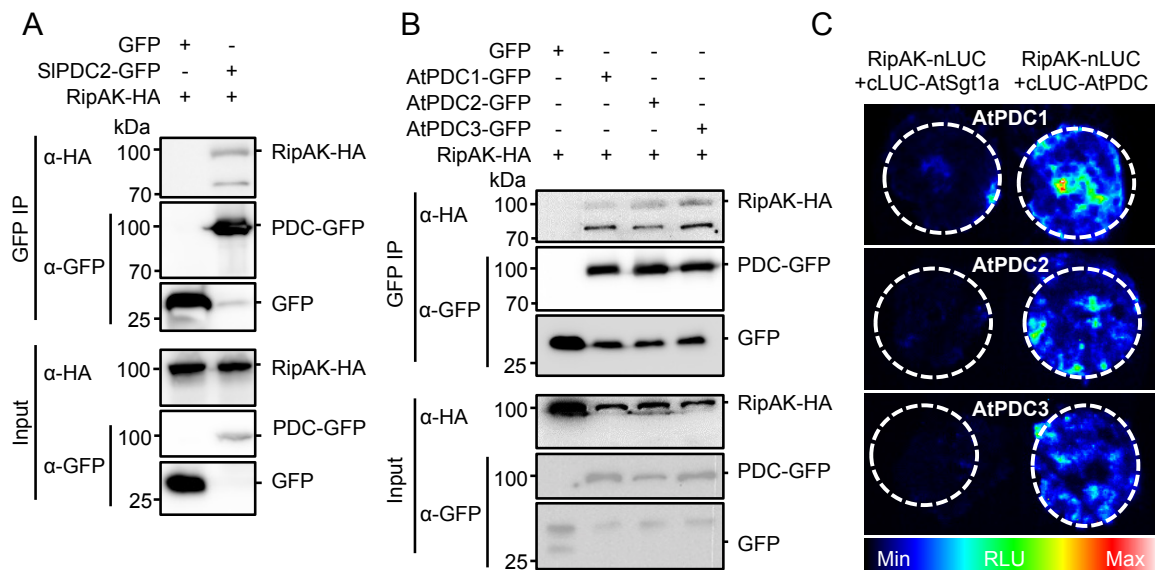

### Figure 2. RipAK interacts with pyruvate decarboxylases.

(A and B) Co-immunoprecipitation assays to determine interactions between RipAK and PDCs from tomato (A) and Arabidopsis (B). A. *tumefaciens* containing the indicated constructs were inoculated in *N. benthamiana* leaves and samples were taken 44 hours post-inoculation (hpi). Immunoblots were analysed with anti-GFP and anti-HA antibodies, and protein marker sizes are provided for reference. These experiments were performed 3 times with similar results. (C) RipAK interacts directly with Arabidopsis PDCs as determined by Split-LUC assays. RipAK-nLUC and cLUC-AtPDCs were co-expressed in *N. benthamiana* leaves, and luciferase complementation was observed 44 hpi. A colour code representing the relative luminescence is shown for reference. cLUC-AtSgt1a was used as negative interaction control. The accumulation of all the proteins was verified and is shown in Figure S3C.

Figure 3

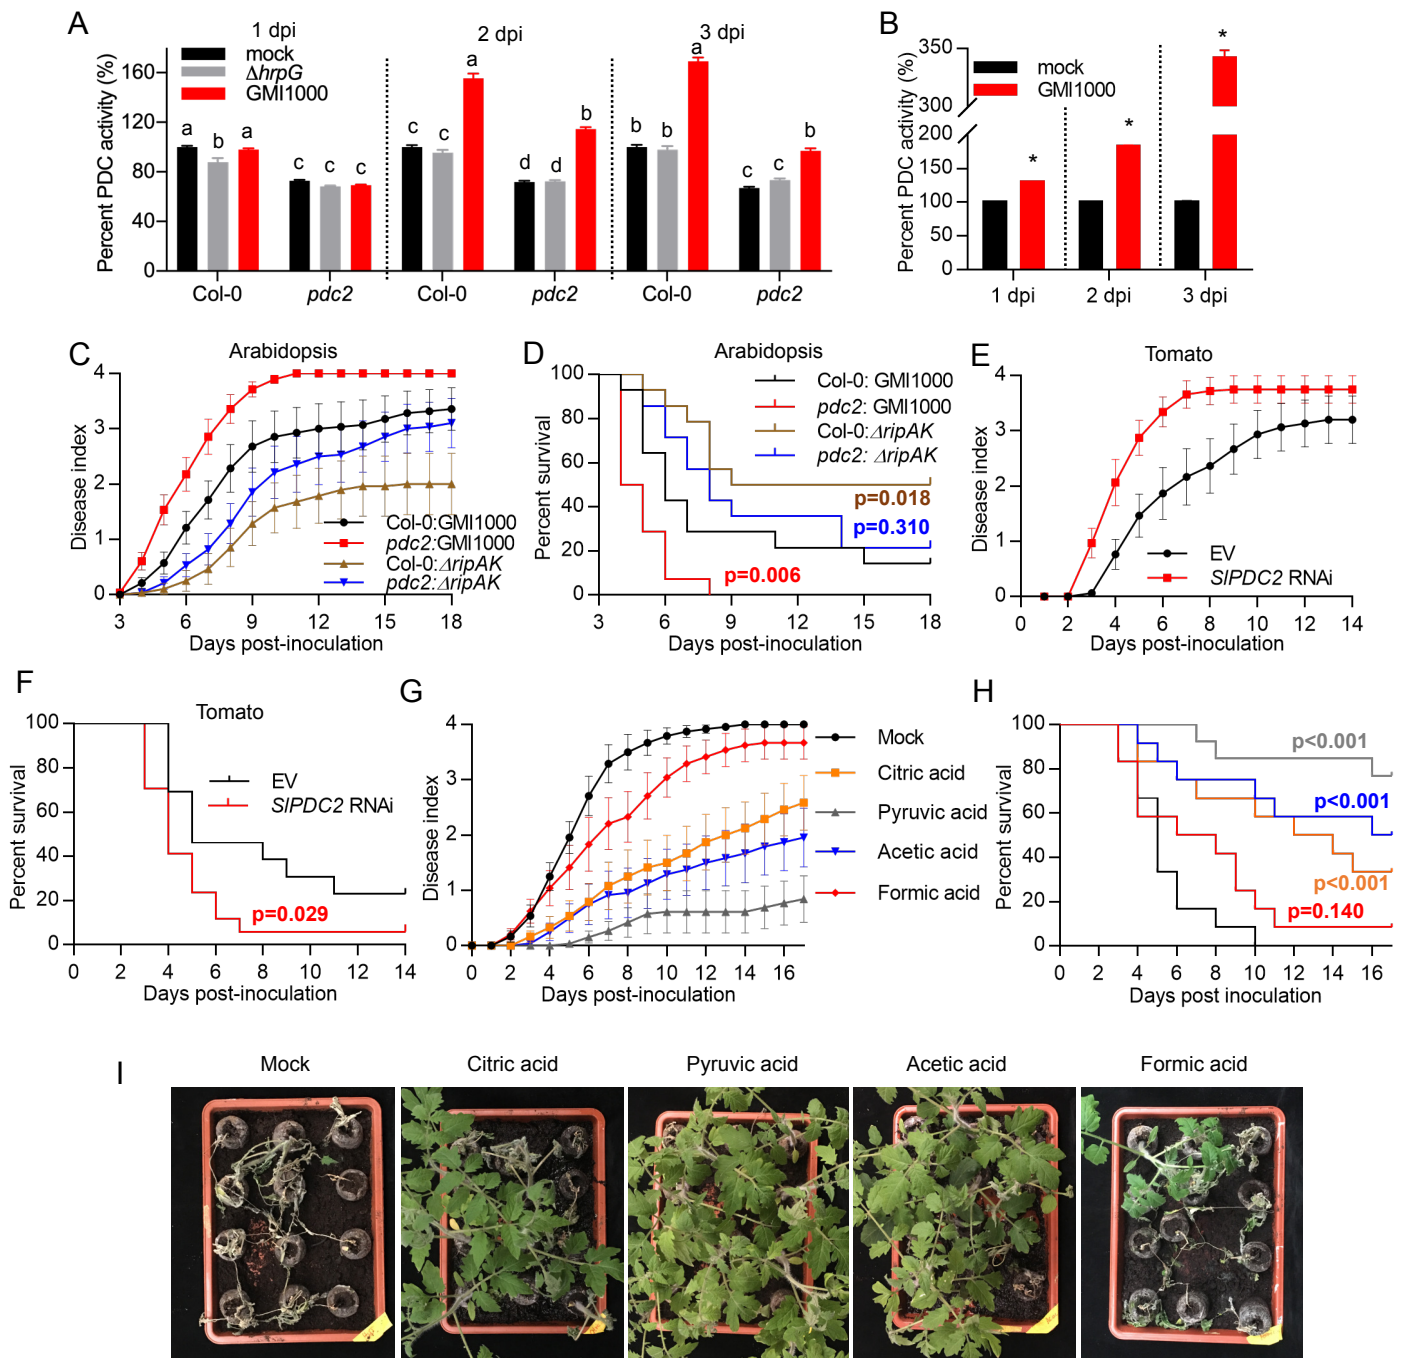

**Figure 3. The PDC-mediated pathway contributes to resistance against *R. solanacearum*.**

(A and B) *R. solanacearum* inoculation in Arabidopsis seedlings (A) or tomato stems (B) stimulates PDC enzymatic activity. (A) Roots of 8 day-old Arabidopsis seedlings were inoculated with 10 $\mu$ l of a 10<sup>5</sup> cfu ml<sup>-1</sup> *R. solanacearum* suspension. GMI1000 WT or a  $\Delta hrpG$  mutant were used, as indicated, and water was used as mock treatment. (B) Stems of 3.5 week-old tomato plants were injected with 5  $\mu$ l of a 10<sup>5</sup> cfu ml<sup>-1</sup> *R. solanacearum* suspension. PDC activity was determined in whole seedlings (A) or stem tissue (B) 1, 2, and 3 dpi, and is represented as percentage PDC activity relative to the wild-type mock control for each day. In A, different letters indicate significantly different values within each time point, as determined using a one-way ANOVA statistical test ( $p < 0.05$ ). In B, asterisks indicate values significantly different to the mock control for each day, as determined using a Student's t test ( $p < 0.001$ ). Values represent mean  $\pm$  SEM ( $n=8$ ). Small error bars may not be visible in some columns. These experiments were performed 3 times with similar results.

(C and D) Soil-drenching inoculation assays in Arabidopsis Col-0 WT or *pdcc2* mutants, performed with GMI1000 WT or the  $\Delta ripAK$  mutant.  $n \geq 15$  plants per genotype. (E and F) Soil-drenching inoculation assays in tomato plants with transgenic roots expressing an empty vector (EV) or an RNAi construct to silence *SIPDC2*, performed with GMI1000 WT. Transgenic roots were generated using *Agrobacterium rhizogenes* (see methods).  $n \geq 8$  plants per genotype. (G and H) Soil-drenching inoculation assays in tomato plants upon pre-treatment with a 30 mM solution of the indicated organic acids or water (as mock control). Treatments were performed by placing the pots on a layer of wet towel paper containing the organic acids for 9 days, and then washed and watered normally without treatment for 3 days before inoculation with *R. solanacearum* GMI1000 WT.  $n \geq 12$  plants per treatment. In C, E, and G the results are represented as disease progression, showing the average wilting symptoms in a scale from 0 to 4 (mean  $\pm$  SEM). D, F, and H show the survival analysis of the data in C, E, and G, respectively; the disease scoring was transformed into binary data with the following criteria: a disease index lower than 2 was defined as '0', while a disease index equal or higher than 2 was defined as '1' for each specific time point. Statistical analysis was performed using a Log-rank (Mantel-Cox) test, and the corresponding p value is shown in the graph with the same colour as each curve. Four, three, and seven independent biological replicates were performed for inoculations in C, E, and G, respectively, and composite data representations are shown in Figure S5. (I) Representative images of the inoculated plants in G-H 17dpi.



Figure 4

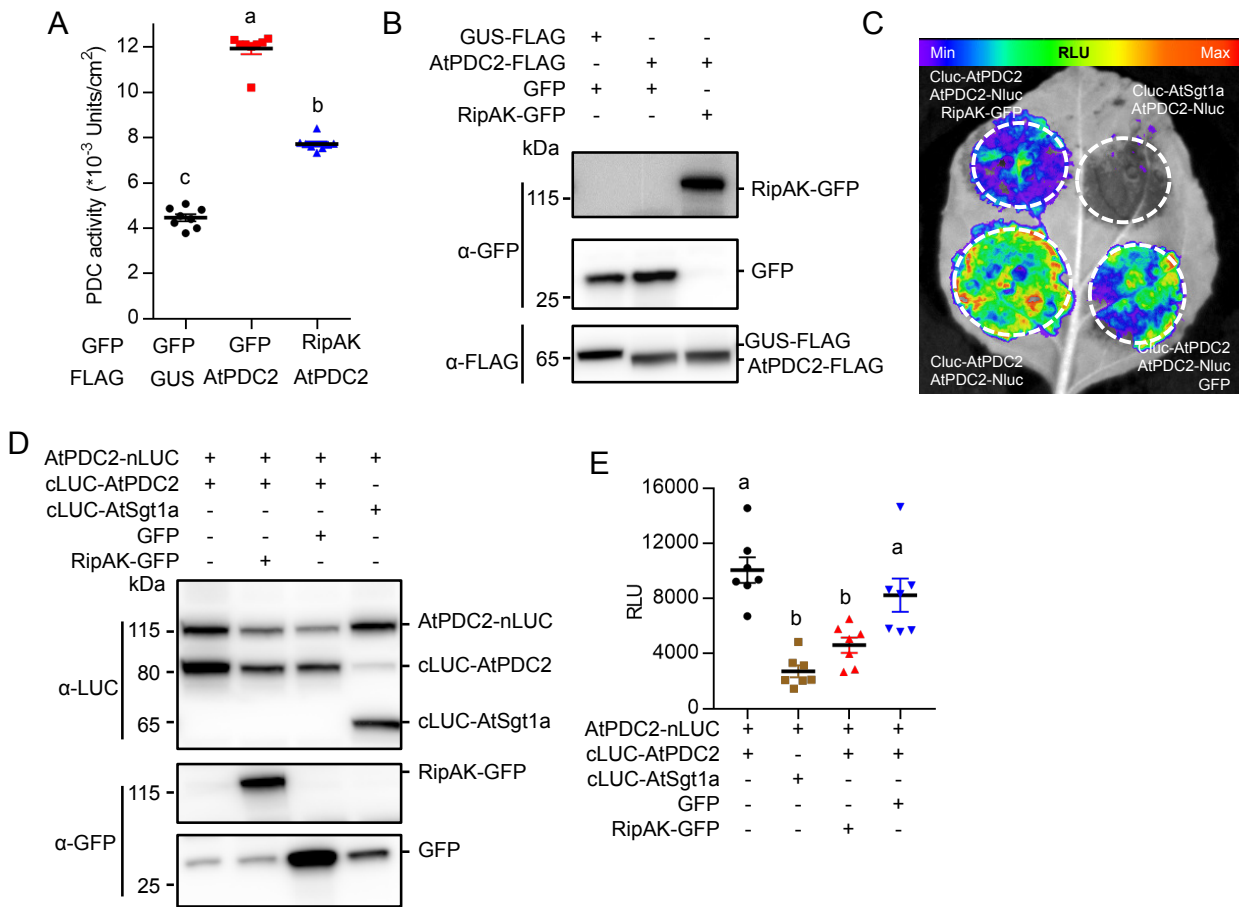

**Figure 4. RipAK inhibits PDC oligomerisation and activity *in vivo*.**

(A) RipAK inhibits AtPDC2 activity in *N. benthamiana*. AtPDC2-FLAG was expressed in *N. benthamiana* leaves using *Agrobacterium*, and GUS-FLAG was used as control. RipAK-GFP (or GFP, as control) was co-expressed with the FLAG-tagged proteins. PDC activity was determined 36 hpi (mean  $\pm$  SEM, n=8 per sample), and is represented as units per area of sampled leaf tissue. (B) Protein accumulation in the tissues used to measure PDC activity shown in (A). (C-E) RipAK inhibits AtPDC2 oligomerisation. AtPDC2-nLUC and cLUC-AtPDC2 were co-expressed in *N. benthamiana* leaves to determine AtPDC2 oligomerisation, and AtPDC2-nLUC was co-expressed with cLUC-AtSgt1a as negative control. RipAK-GFP (or GFP, as control) was co-expressed with AtPDC2-nLUC and cLUC-AtPDC2 to determine interference with AtPDC2 oligomerisation. Luciferase complementation was observed 44 hpi, and is shown in (C). A colour code representing the relative luminescence is shown for reference. (D) Protein accumulation in the tissues used for Split-LUC assays. (E) Quantification of luminescence as relative luminescence units (RLU), as detailed in the methods section (mean  $\pm$  SEM, n=8 per sample). Different letters indicate significantly different values, as determined using a one-way ANOVA statistical test ( $p < 0.05$ ). The immunoblots in this figure were developed using anti-GFP, anti-FLAG, or anti-LUC antibody; the relative position of the different proteins in the blots and protein marker sizes are provided for reference. These experiments were performed 3 times with similar results.

Figure S1

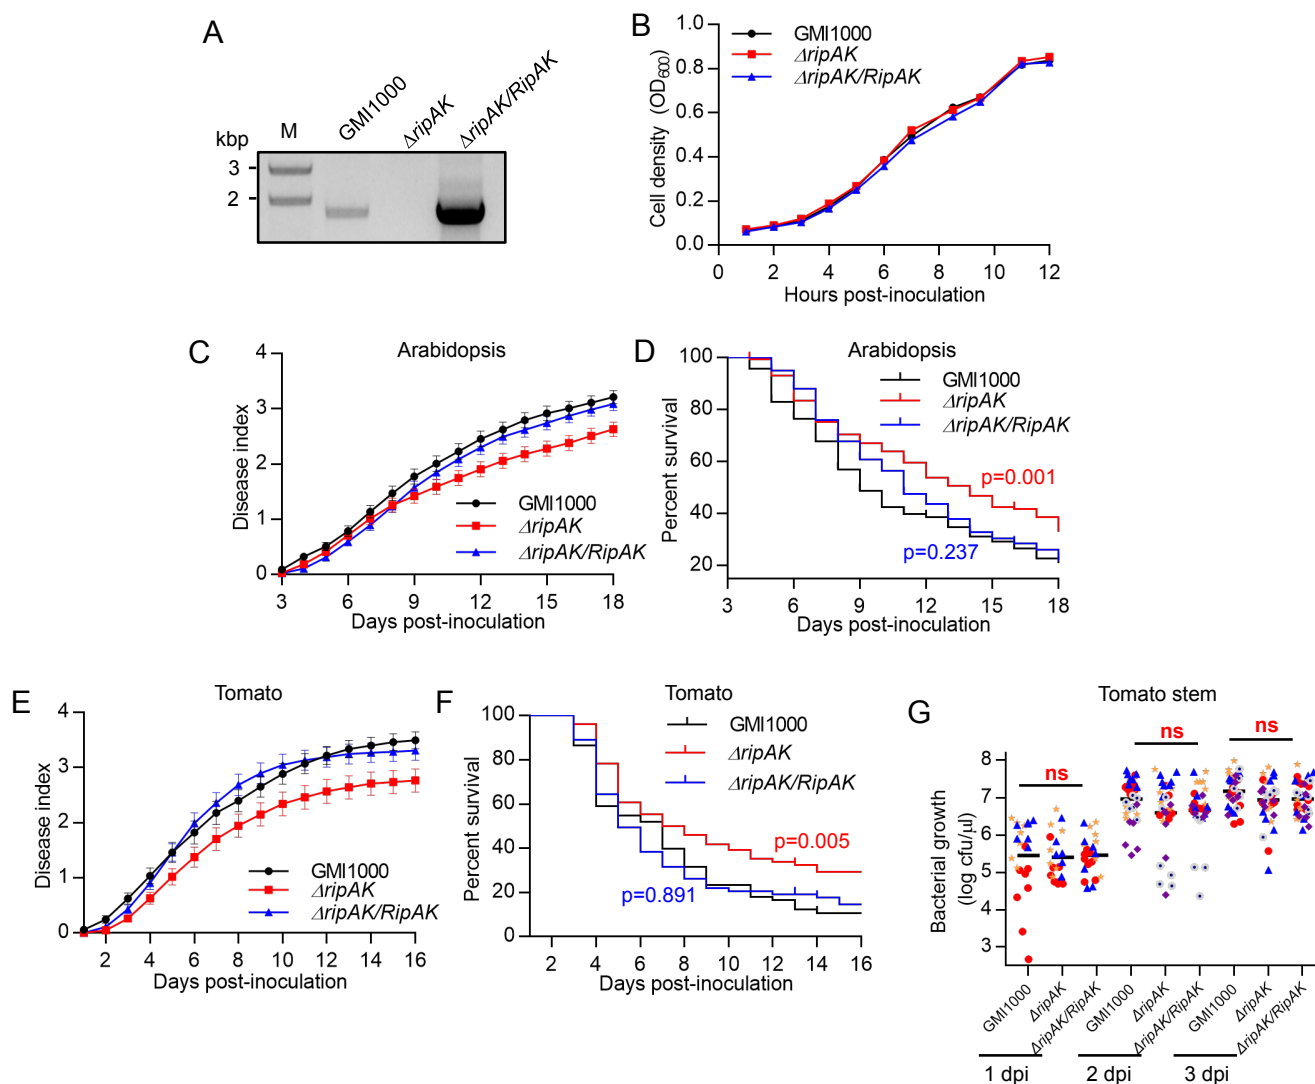

**Figure S1. Validation of  $\Delta ripAK$  mutant strains and associated virulence analysis.**

(A) Genotyping of the  $\Delta ripAK$  mutant and  $\Delta ripAK/RipAK$  complementation strains, using GMI1000 as control. The PCR shows the presence/absence of the *ripAK* fragment in these strains. (B) The  $\Delta ripAK$  mutant and  $\Delta ripAK/RipAK$  complementation strains do not show differences in fitness compared to GMI1000 in nutrient-rich liquid medium. The different strains were inoculated in liquid Phi medium with an initial concentration of  $OD_{600}=0.02$ , and optical density was measured over time. Values represent mean  $\pm$  SEM ( $n=3$ ). (C and D) RipAK contributes to *R. solanacearum* infection in Arabidopsis. Composite data from 9 independent biological repeats (a representative assay is shown in Figure 1A and 1B). All values were pulled together and represented as disease index (C) or percent survival (D). Disease index values represent mean  $\pm$  SEM ( $n=158$ ). (E and F) RipAK contributes to *R. solanacearum* infection in tomato. Composite data from 5 independent biological repeats (a representative assay is shown in Figure 1C and 1D). All values were pulled together and represented as disease index (E) or percent survival (F). Disease index values represent mean  $\pm$  SEM ( $n=78$ ). Statistical analysis was performed using a Log-rank (Mantel-Cox) test, and the corresponding p value is shown in the graph with the same colour as each curve. (G) The  $\Delta ripAK$  mutant and  $\Delta ripAK/RipAK$  complementation strains do not show differences in growth upon tomato stem injection compared to GMI1000. 3.5-week old tomato plants were injected with 5  $\mu L$  of a  $10^6$  cfu  $mL^{-1}$  and samples were collected 1, 2, and 3 dpi. Five independent biological repeats were performed ( $n=6$  plants per strain in each replicate) with similar results. Values from all the replicates are represented in this graph; values with the same colour correspond to the same repeat. ns indicates no significant differences among these strains according to a Student's t test ( $p>0.05$ ).

Figure S2

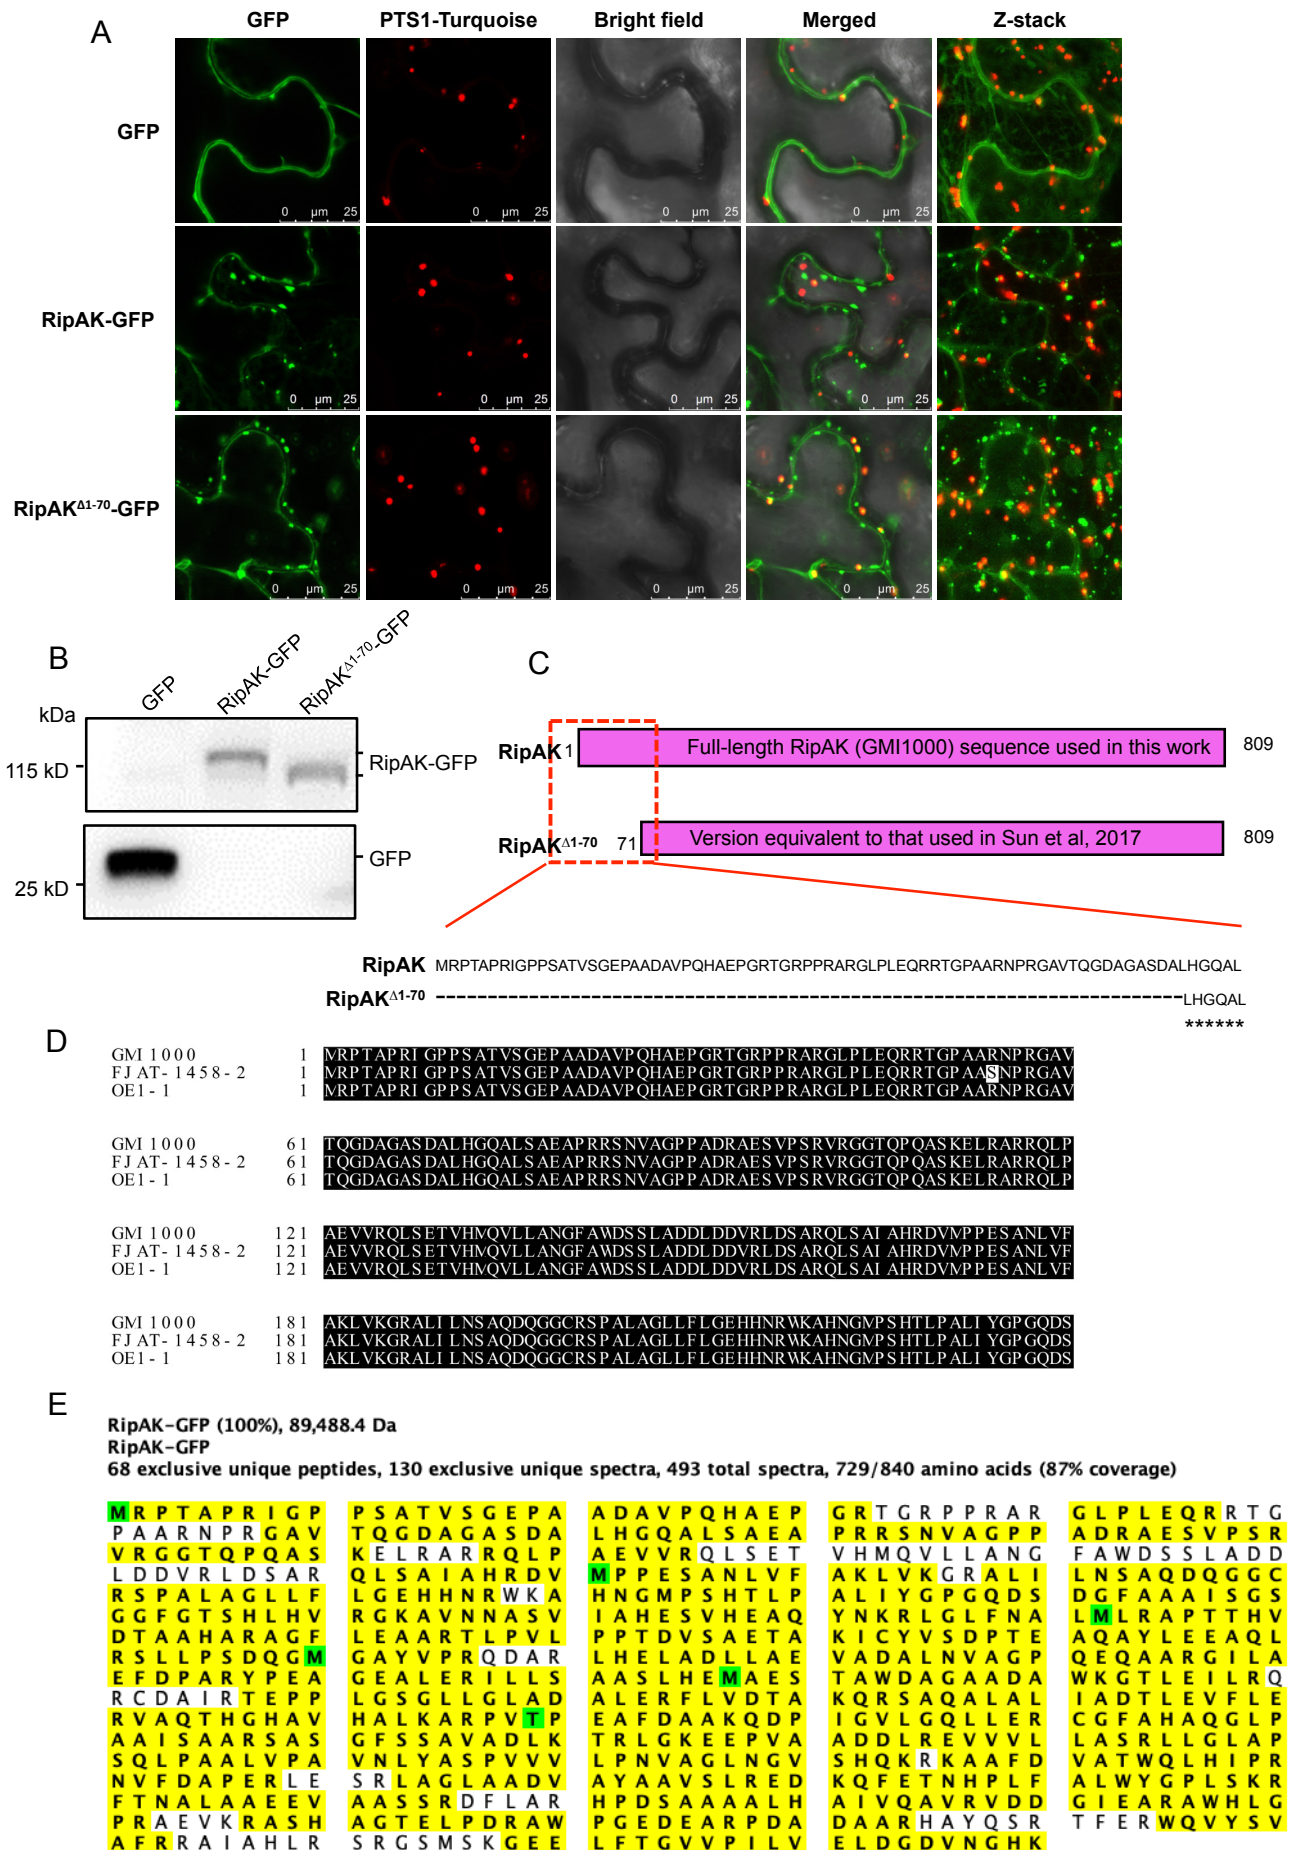

**Figure S2. Comparison between the full RipAK reference sequence and the RipAK<sup>Δ1-70</sup> truncated version.**

(A) Subcellular localization of RipAK-GFP, RipAK<sup>Δ1-70aa</sup>, and free GFP (as control) in *N. benthamiana* leaf cells observed using confocal microscopy upon transient expression using *A. tumefaciens*. GFP-tagged proteins were co-expressed with PTS1 (peroxisome targeting signal 1) fused to Turquoise fluorescent protein to allow for visualization of peroxisomes. Bright field is provided for reference, and merged signals show the relative localization of GFP and peroxisomes-tagged proteins. Fluorescence was visualized 48 hours-post inoculation. Scale bar = 25 μm. Z-stack shows a vertical cross-section through the observed cells. (B) Western blot to determine the accumulation of GFP tagged proteins in the tissues used for confocal microscopy in (A). Samples were taken 40 hpi, immunoblots were analysed with an anti-GFP antibody, and protein marker sizes are provided for reference. (C) Diagram comparing the full RipAK version used in this work and the truncated version used in Sun et al, (2017). (D) Amino acid sequence of RipAK from different sequenced strains belonging to the phylotype I, including the reference strain GMI1000 (sequence used in this work), showing that the first 70 amino acids are present and highly conserved in different phylotype I strains. Reference sequences were retrieved from the RaIstoT3E database (Peeters et al, 2013; Sabbagh et al, 2019; <https://iant.toulouse.inra.fr/bacteria/annotation/site/prj/T3Ev3/> ). (E) The full RipAK-GFP accumulates in *N. benthamiana* tissues upon transient expression using *Agrobacterium*. Liquid chromatography and Mass spectrometry (LC-MS) analysis was performed after GFP immunoprecipitation. The highlighted tryptic peptides were detected, representing 87% coverage of the total RipAK sequence, including peptides within the first 70 amino acids. Non-highlighted residues represent peptides that were not detected, probably due to technical reasons associated to the tryptic digestion or the LC-MS analysis.

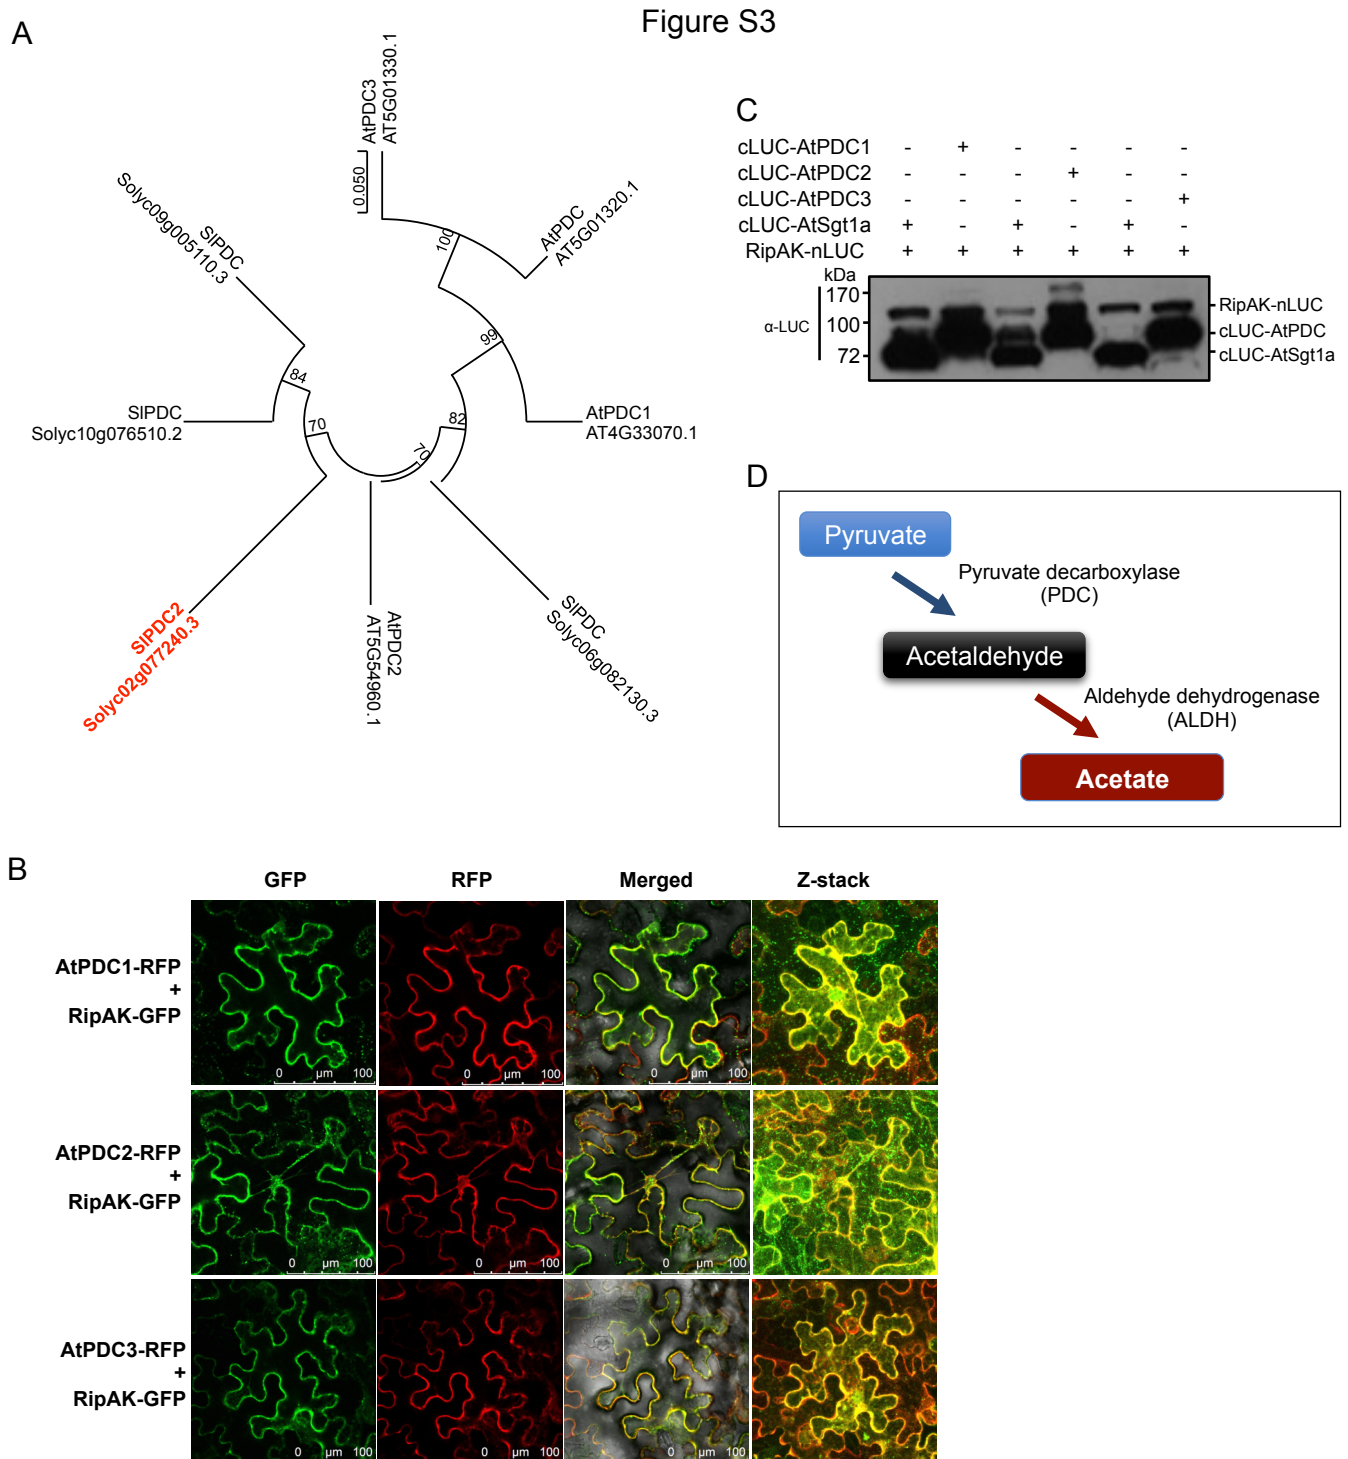

**Figure S3. RipAK interacts with PDCs.**

(A) Phylogenetic tree of PDC proteins from Arabidopsis and tomato. Proteins annotated as “pyruvate decarboxylase” or PDC-family proteins (such as AT5G01320.1) are shown. The SIPDC identified as RipAK interactor (Solyc02g077240) was annotated in this work as SIPDC2 given its high similarity with AtPDC2. The phylogenetic tree was generated using the MEGA X software using the Maximum likelihood method. (B) Co-localization of RipAK-GFP and AtPDCs tagged with a red fluorescent protein (RFP) in *N. benthamiana* leaf cells observed using confocal microscopy upon transient expression using *A. tumefaciens*. Merged signals show the relative localization of GFP and RFP-tagged proteins. Fluorescence was visualized 40 hpi. Scale bars = 100  $\mu$ m. Z-stack shows a vertical cross-section through the observed cells. (C) Protein accumulation in the tissues used to perform the Split-LUC assays shown in Figure 2C. RipAK-nLUC and cLUC-AtPDCs were co-expressed in *N. benthamiana* leaves, and cLUC-AtSGT1a was used as negative interaction control. The immunoblot was developed using anti-LUC antibody; the relative position of the different proteins in the blot and protein marker sizes are provided for reference. (D) Simplified diagram of the PDC pathway in stress conditions.

Figure S4

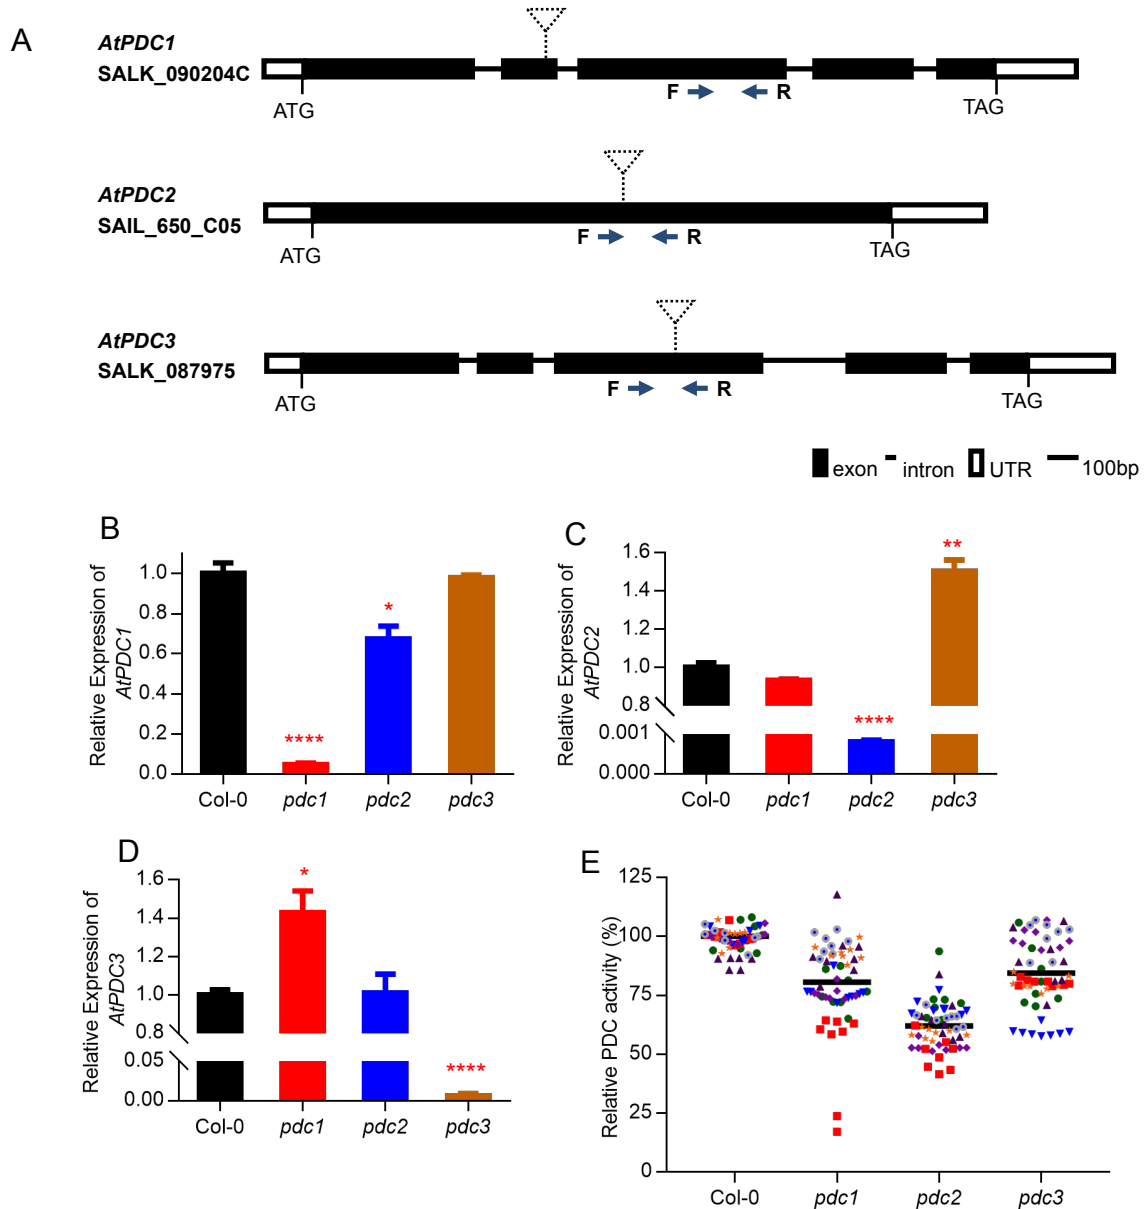

**Figure S4. Characterization of Arabidopsis *pdc* mutant lines.**

(A) Diagram showing the gene structure of *AtPDC1*, *AtPDC2* and *AtPDC3*. Start (ATG) and stop codons are indicated; black boxes represent coding regions, white boxes represent untranslated regions, lines represent introns, and dotted triangles show the location of the T-DNA insertions in each mutant line. F and R indicate the matching sequence of the forward and reverse primers, respectively, used for the subsequent qPCRs to determine gene expression. (B-D) Expression of *AtPDC1*, *AtPDC2*, and *AtPDC3* in *pdc* mutant lines. Values were normalized to the expression of the *AtACT2* gene (*AtXXX*) and are shown relative to the expression of each *PDC* gene in Col-0 WT. Values represent mean  $\pm$  SEM ( $n=3$  seedlings per genotype). The experiments were performed 3 times with similar results. (E) Measurement of PDC activity in Arabidopsis *pdc* mutant lines, using 10 day-old seedlings. Seven independent biological repeats were performed ( $n=8$  seedlings per genotype). Values from all the repeats are represented in this graph as percentage of the PDC activity observed in Col-0 WT seedlings in each repeat; values with the same colour correspond to the same repeat. Black bars represent the average values for each mutant. Although all the mutants showed reduction in activity in certain repeats, only *pdc2* mutant seedlings showed lower PDC activity than Col-0 WT seedlings in all the repeats.

Figure S5

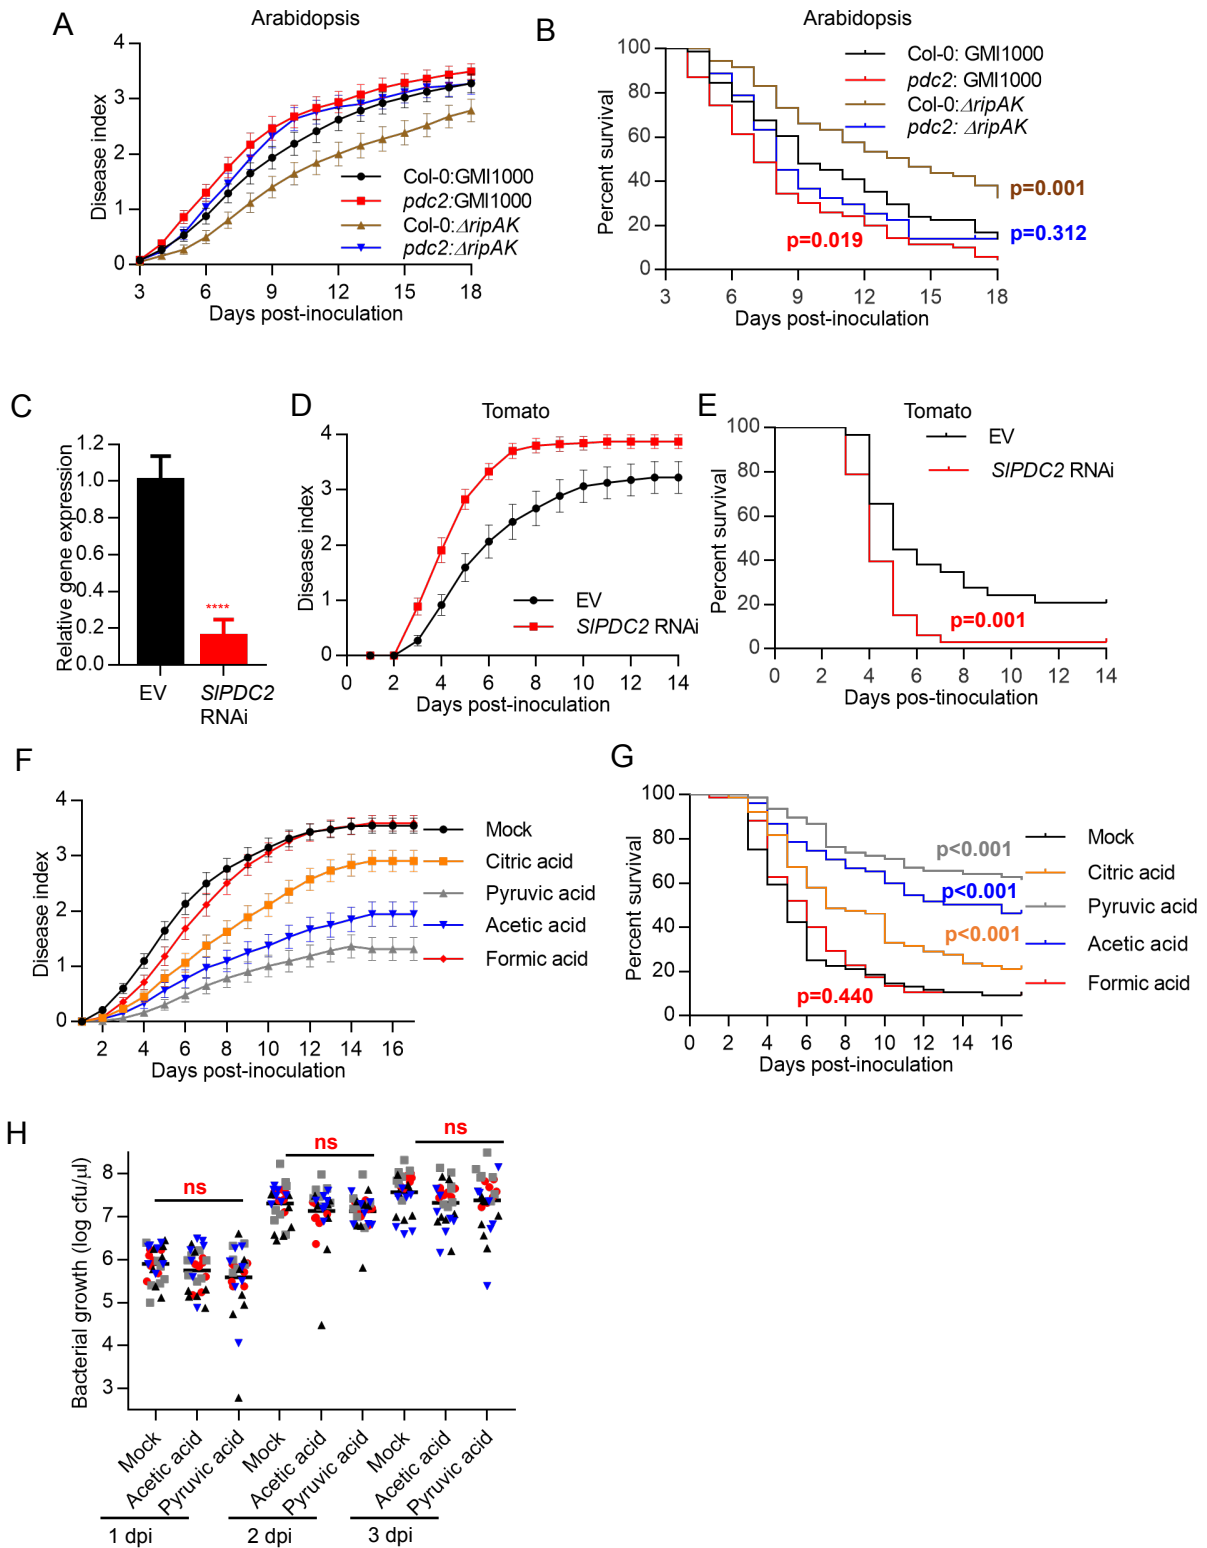

**Figure S5. PDCs contribute to plant resistance against *R. solanacearum*.**

(A and B) The Arabidopsis *pd2* mutant shows enhanced susceptibility to *R. solanacearum* infection, and rescues the virulence attenuation of the *ΔripAK* mutant. Composite data from 4 independent biological repeats (a representative assay is shown in Figure 3C and 3D). All values were pooled together and represented as disease index (A) or percent survival (B). Disease index values represent mean  $\pm$  SEM (n=71). (C) Expression of the *SIPDC2* gene in tomato roots expressing the *SIPDC2*-RNAi construct used in the experiments shown in Figure 3E and 3F, determined by qRT-PCR. Values were normalized to the expression of the SIEF1 $\alpha$ -1 gene, and are shown as relative to the expression in roots expressing the empty vector (EV). Values represent mean  $\pm$  SEM (n=3 samples per genotype), and asterisks represent significant differences according to a Student's t test (\*\*\*\*P<0.0001). (D and E) *SIPDC2* contributes to resistance against *R. solanacearum* infection in tomato. Composite data from 3 independent biological repeats (a representative assay is shown in Figure 3E and 3F). All values were pooled together and represented as disease index (D) or percent survival (E). Disease index values represent mean  $\pm$  SEM (n=32). Statistical analysis was performed using a Log-rank (Mantel-Cox) test, and the corresponding p value is shown in the graph with the same colour as each curve. (F and G) Soil-drenching inoculation assays in tomato plants upon pre-treatment with a 30 mM solution of the indicated organic acids or water (as mock control). Treatments were performed by placing the pots on a layer of wet towel paper containing the organic acids for 9 days, and then washed and watered normally without treatment for 3 days before inoculation with *R. solanacearum* GMI1000 WT. Composite data from 7 independent biological repeats (a representative assay is shown in Figures 3G and 3H). All values were pooled together and represented as disease index (F) or percent survival (G). Disease index values represent mean  $\pm$  SEM (n=74). Statistical analysis was performed using a Log-rank (Mantel-Cox) test, and the corresponding p value is shown in the graph with the same colour as each curve. (H) Treatment with pyruvic acid or acetic acid (performed as in F) causes no differences in the growth of *R. solanacearum* GMI1000 upon stem injection. After treatments, 3.5-week old tomato plants were injected with 5  $\mu$ L of a 10<sup>6</sup> cfu mL<sup>-1</sup> and samples were collected 1, 2, and 3 dpi. Four independent biological repeats were performed (n=7 plants per treatment) with similar results. Values from all the replicates are represented in this graph; values with the same colour correspond to the same repeat. ns indicates no significant differences among these treatments according to a Student's t test (p>0.05).
